# Supplementary material for: Epigenetic signatures associated with imprinted paternally expressed genes in the Arabidopsis endosperm
Source: Genome Biol. 2019 Feb 21;20:41. doi: 10.1186/s13059-019-1652-0 (PMC6385439; doi:10.1186/s13059-019-1652-0)
Supplement: Supplementary file 4 — Table S5. Parent-of-origin RNAseq dataset of 4 DAP INTACT-purified endosperm of Col × Ler reciprocal crosses. (XLSX 904 kb) [file 13059_2019_1652_MOESM4_ESM.xlsx]

## Sheet: Additional File 4 Table S5
Table S5. Parent-of-origin RNAseq dataset of 4DAP INTACT-purified endosperm of Col x Ler reciprocal crosses. For all analyses we used a P-value(corrected using the Benjamini-Hochberg method) of 0.01 as significance threshold. The following categories for parentally-biased gene expression were defined: Col Dominant: Gene qualifies as MEG in Col x Ler, but as PEG in Ler x Col. Ler Dominant: Gene qu…
id	Reads_mat_Col	Reads_pat_Ler	Chi	Fration_mat	Reads_Mat_Ler	Reads_pat_Col	Chi	Fration_mat	Category	Epigenetic Score
AT1G01225	35	5	0.0087	0.875	8	16	1	0.667	MEG_CxL	5
AT1G01290	653	229	0	0.74	235	565	0.0296	0.706	Bial	4
AT1G01300	277	46	0	0.858	159	100	0	0.386	ColDom	1
AT1G01310	46	63	0	0.422	71	19	0	0.211	PEG	NA
AT1G01320	534	283	0.4851	0.654	253	588	0.07	0.699	Bial	4
AT1G01430	25	2	0.0072	0.926	8	51	0.0027	0.864	MEG	3
AT1G01440	28	7	0.125	0.8	2	18	0.0433	0.9	Bial	4
AT1G01448	151	59	0.1407	0.719	31	102	0.0244	0.767	Bial	NA
AT1G01490	258	0	0	1	4	290	0	0.986	MEG	1
AT1G01710	306	146	0.6894	0.677	94	273	0.0035	0.744	Bial	NA
AT1G01720	497	93	0	0.842	95	259	0.017	0.732	Bial	4
AT1G01730	91	17	0.0002	0.843	26	42	0.4635	0.618	Bial	0
AT1G01750	45	21	0.8256	0.682	29	42	0.237	0.592	Bial	NA
AT1G01770	229	93	0.12	0.711	65	192	0.0116	0.747	Bial	4
AT1G01780	833	522	0.0001	0.615	579	1136	0.7625	0.662	Bial	0
AT1G01790	323	143	0.2751	0.693	171	304	0.2806	0.64	Bial	4
AT1G01800	55	2	0	0.965	5	70	0	0.933	MEG	4
AT1G02080	34	11	0.2534	0.756	10	15	0.5516	0.6	Bial	4
AT1G02090	62	29	0.8026	0.681	74	113	0.1033	0.604	Bial	NA
AT1G02260	36	4	0.0032	0.9	21	34	0.519	0.618	MEG_CxL	NA
AT1G02305	88	42	0.8344	0.677	24	71	0.1357	0.747	Bial	0
AT1G02640	853	24	0	0.973	21	277	0	0.93	MEG	0
AT1G02650	75	26	0.1385	0.743	14	27	0.931	0.659	Bial	3
AT1G02660	352	33	0	0.914	55	160	0.027	0.744	MEG_CxL	4
AT1G02670	203	48	0	0.809	143	269	0.623	0.653	Bial	3
AT1G02680	624	135	0	0.822	456	496	0	0.521	Bial	0
AT1G02690	1287	273	0	0.825	661	613	0	0.481	PEG_LxC	4
AT1G02720	158	72	0.5676	0.687	50	176	0.0008	0.779	Bial	3
AT1G02740	29	0	0.0003	1	10	25	0.6198	0.714	MEG_CxL	1
AT1G02770	1734	630	0	0.734	1127	1910	0	0.629	Bial	3
AT1G02780	4522	1677	0	0.729	2179	3483	0	0.615	Bial	3
AT1G02790	339	40	0	0.894	54	0	0	0	ColDom	0
AT1G02840	1069	496	0.2117	0.683	293	647	0.2138	0.688	Bial	0
AT1G02860	163	119	0.0029	0.578	48	45	0.0005	0.484	PEG_LxC	NA
AT1G02890	478	53	0	0.9	268	294	0	0.523	MEG_CxL	4
AT1G02910	170	41	0	0.806	85	249	0.0045	0.746	Bial	4
AT1G02930	218	0	0	1	0	570	0	1	MEG	5
AT1G02940	69	30	0.5761	0.697	22	17	0.0045	0.436	PEG_LxC	4
AT1G02970	335	172	0.8112	0.661	114	302	0.0183	0.726	Bial	5
AT1G02980	189	127	0.0155	0.598	116	287	0.0798	0.712	Bial	4
AT1G03030	328	93	0	0.779	79	199	0.1187	0.716	Bial	0
AT1G03080	345	12	0	0.966	47	319	0	0.872	MEG	0
AT1G03090	236	70	0.0002	0.771	45	149	0.0055	0.768	Bial	4
AT1G03100	125	23	0	0.845	3	64	0	0.955	poMEG	6
AT1G03106	204	25	0	0.891	74	30	0	0.288	ColDom	3
AT1G03110	217	172	0	0.558	89	235	0.0409	0.725	Bial	5
AT1G03120	83	20	0.0048	0.806	48	56	0.0104	0.538	Bial	3
AT1G03130	102	12	0	0.895	23	118	0.0001	0.837	poMEG	0
AT1G03150	40	18	0.7527	0.69	24	40	0.5516	0.625	Bial	4
AT1G03160	99	37	0.1666	0.728	17	52	0.1728	0.754	Bial	4
AT1G03180	98	22	0.001	0.817	20	88	0.0023	0.815	Bial	NA
AT1G03190	573	452	0	0.559	492	879	0.0692	0.641	Bial	1
AT1G03210	433	220	0.8714	0.663	282	378	0	0.573	Bial	4
AT1G03290	155	78	0.9704	0.665	153	302	0.9187	0.664	Bial	0
AT1G03370	23	37	0	0.383	26	33	0.1163	0.559	PEG_CxL	0
AT1G04140	257	53	0	0.829	117	299	0.0396	0.719	Bial	4
AT1G04170	127	29	0.0002	0.814	76	81	0.0002	0.516	Bial	5
AT1G04210	164	51	0.0049	0.763	54	171	0.0059	0.76	Bial	4
AT1G04220	470	3	0	0.994	7	103	0	0.936	MEG	7
AT1G04260	317	210	0.0028	0.602	138	357	0.0178	0.721	Bial	1
AT1G04270	2501	489	0	0.836	1045	1125	0	0.518	Bial	0
AT1G04280	121	17	0	0.877	4	154	0	0.975	MEG	NA
AT1G04290	727	297	0.0057	0.71	468	1128	0.0015	0.707	Bial	4
AT1G04295	714	285	0.0024	0.715	455	1102	0.0013	0.708	Bial	NA
AT1G04300	604	329	0.2592	0.647	502	791	0.0001	0.612	Bial	1
AT1G04340	118	43	0.1009	0.733	39	56	0.1545	0.589	Bial	NA
AT1G04380	588	223	0.0008	0.725	306	509	0.019	0.625	Bial	5
AT1G04390	138	18	0	0.885	41	161	0.0002	0.797	poMEG	4
AT1G04410	763	210	0	0.784	268	817	0	0.753	Bial	4
AT1G04420	147	67	0.5827	0.687	45	126	0.0783	0.737	Bial	3
AT1G04425	531	0	0	1	343	3	0	0.009	ColDom	NA
AT1G04430	152	0	0	1	12	61	0.0045	0.836	poMEG	1
AT1G04445	126	85	0.0468	0.597	58	124	0.7346	0.681	Bial	NA
AT1G04480	111	49	0.5236	0.694	47	101	0.7424	0.682	Bial	NA
AT1G04510	140	70	1	0.667	93	120	0.0029	0.563	Bial	4
AT1G04530	32	5	0.0168	0.865	21	48	0.6747	0.696	Bial	4
AT1G04540	259	41	0	0.863	154	19	0	0.11	ColDom	3
AT1G04550	75	47	0.2733	0.615	44	174	0.0001	0.798	Bial	4
AT1G05000	12	62	0	0.162	13	43	0.1517	0.768	PEG_CxL	8
AT1G05010	28	0	0.0004	1	24	49	0.9475	0.671	MEG_CxL	4
AT1G05020	32	18	0.7328	0.64	13	24	0.856	0.649	Bial	4
AT1G05030	386	122	0	0.76	159	228	0.0026	0.589	Bial	4
AT1G05070	708	151	0	0.824	116	387	0	0.769	Bial	3
AT1G05120	172	114	0.0292	0.601	75	189	0.1284	0.716	Bial	3
AT1G05150	197	56	0.0003	0.779	50	125	0.2393	0.714	Bial	3
AT1G05160	422	101	0	0.807	116	191	0.1392	0.622	Bial	3
AT1G05190	171	63	0.0538	0.731	94	223	0.2197	0.703	Bial	3
AT1G05200	50	9	0.0056	0.847	0	43	0	1	poMEG	4
AT1G05230	16	7	0.8033	0.696	11	26	0.7054	0.703	Bial	4
AT1G05320	237	1	0	0.996	0	126	0	1	MEG	5
AT1G05350	912	174	0	0.84	530	410	0	0.436	PEG_LxC	3
AT1G05360	416	99	0	0.808	171	272	0.0312	0.614	Bial	3
AT1G05370	35	53	0	0.398	29	115	0.0017	0.799	PEG_CxL	1
AT1G05385	146	20	0	0.88	30	49	0.4539	0.62	MEG_CxL	NA
AT1G05400	106	33	0.0252	0.763	54	106	0.9304	0.662	Bial	NA
AT1G05410	645	446	0	0.591	471	947	0.9409	0.668	Bial	3
AT1G05430	135	99	0.0062	0.577	47	134	0.056	0.74	Bial	3
AT1G05440	54	16	0.0864	0.771	35	49	0.148	0.583	Bial	3
AT1G05450	5	20	0	0.2	1	25	0.003	0.962	LerDom	NA
AT1G05460	74	83	0	0.471	239	284	0	0.543	poPEG	4
AT1G05490	97	9	0	0.915	20	216	0	0.915	MEG	3
AT1G05520	100	48	0.8446	0.676	49	139	0.0545	0.739	Bial	0
AT1G05580	56	11	0.0057	0.836	25	1	0	0.038	PEG_LxC	NA
AT1G05620	70	45	0.233	0.609	42	128	0.0288	0.753	Bial	3
AT1G05630	375	106	0	0.78	147	246	0.1249	0.626	Bial	3
AT1G05680	25	1	0.0026	0.962	8	57	0.0008	0.877	MEG	NA
AT1G05750	122	18	0	0.871	22	76	0.0366	0.776	MEG_CxL	4
AT1G05785	77	21	0.0194	0.786	46	46	0.0015	0.5	PEG_LxC	3
AT1G05790	21	10	0.9177	0.677	17	16	0.0432	0.485	Bial	4
AT1G05800	16	11	0.4706	0.593	1	27	0.0018	0.964	MEG_LxC	NA
AT1G05805	52	11	0.0123	0.825	5	49	0.0004	0.907	MEG_LxC	6
AT1G05820	100	17	0	0.855	13	19	0.4539	0.594	MEG_CxL	3
AT1G05830	224	59	0	0.792	71	136	0.815	0.657	Bial	4
AT1G05835	177	92	0.7994	0.658	50	224	0	0.818	Bial	1
AT1G05840	647	131	0	0.832	226	402	0.2123	0.64	Bial	3
AT1G05850	149	9	0	0.943	43	171	0.0001	0.799	poMEG	10
AT1G05870	133	38	0.0037	0.778	162	52	0	0.243	PEG_LxC	NA
AT1G05900	29	14	0.9294	0.674	10	26	0.5516	0.722	Bial	NA
AT1G05920	32	7	0.059	0.821	37	11	0	0.229	PEG_LxC	NA
AT1G05970	36	11	0.1888	0.766	19	35	0.8194	0.648	Bial	NA
AT1G06010	1023	276	0	0.788	259	678	0.0005	0.724	Bial	9
AT1G06040	117	59	0.9658	0.665	29	67	0.5878	0.698	Bial	0
AT1G06050	34	8	0.0694	0.81	9	11	0.3361	0.55	Bial	4
AT1G06070	41	76	0	0.35	102	104	0	0.505	poPEG	8
AT1G06110	229	67	0.0002	0.774	52	215	0	0.805	Bial	NA
AT1G06150	43	31	0.1535	0.581	10	57	0.0029	0.851	MEG_LxC	4
AT1G06190	237	37	0	0.865	142	184	0.0002	0.564	MEG_CxL	3
AT1G06200	120	67	0.5253	0.642	69	133	0.8449	0.658	Bial	4
AT1G06210	535	226	0.0484	0.703	292	625	0.4107	0.682	Bial	3
AT1G06220	56	73	0	0.434	34	84	0.3677	0.712	PEG_CxL	3
AT1G06230	1070	409	0	0.723	518	1400	0	0.73	Bial	1
AT1G06240	38	30	0.0817	0.559	8	43	0.0137	0.843	Bial	3
AT1G06250	180	73	0.1679	0.711	55	156	0.0409	0.739	Bial	4
AT1G06265	563	131	0	0.811	241	322	0	0.572	Bial	NA
AT1G06270	124	51	0.2904	0.709	28	157	0	0.849	Bial	3
AT1G06370	89	30	0.0828	0.748	38	63	0.4322	0.624	Bial	NA
AT1G06380	665	289	0.0654	0.697	284	612	0.3688	0.683	Bial	7
AT1G06390	22	7	0.3474	0.759	5	25	0.0798	0.833	Bial	4
AT1G06410	2474	801	0	0.755	1926	3937	0.5065	0.671	Bial	4
AT1G06420	68	7	0	0.907	59	66	0.0022	0.528	MEG_CxL	3
AT1G06430	31	11	0.3818	0.738	11	35	0.232	0.761	Bial	2
AT1G06450	483	60	0	0.89	208	195	0	0.484	ColDom	3
AT1G06460	578	143	0	0.802	276	439	0.0056	0.614	Bial	3
AT1G06475	6	15	0.0004	0.286	10	12	0.2913	0.545	PEG_CxL	3
AT1G06500	265	96	0.0109	0.734	101	180	0.4257	0.641	Bial	3
AT1G06530	634	321	0.8788	0.664	346	1322	0	0.793	Bial	4
AT1G06540	75	21	0.0264	0.781	26	42	0.4635	0.618	Bial	NA
AT1G06550	877	131	0	0.87	162	1122	0	0.874	MEG	4
AT1G06560	256	62	0	0.805	90	191	0.7057	0.68	Bial	4
AT1G06580	132	19	0	0.874	71	151	0.7294	0.68	MEG_CxL	4
AT1G06590	574	259	0.2132	0.689	292	645	0.213	0.688	Bial	6
AT1G06630	94	34	0.1368	0.734	20	62	0.1236	0.756	Bial	4
AT1G06670	309	187	0.0559	0.623	147	295	0.9802	0.667	Bial	4
AT1G06690	66	29	0.6138	0.695	33	34	0.0106	0.507	Bial	4
AT1G06700	261	26	0	0.909	75	60	0	0.444	ColDom	4
AT1G06710	35	8	0.0578	0.814	16	38	0.6323	0.704	Bial	4
AT1G06720	62	34	0.7106	0.646	26	62	0.5238	0.705	Bial	4
AT1G06780	24	8	0.3727	0.75	31	59	0.8616	0.656	Bial	9
AT1G06790	83	45	0.708	0.648	16	72	0.0051	0.818	Bial	NA
AT1G06810	30	3	0.0055	0.909	9	13	0.5238	0.591	MEG_CxL	NA
AT1G06820	74	35	0.8194	0.679	19	17	0.023	0.472	Bial	NA
AT1G06850	90	20	0.0014	0.818	10	38	0.0978	0.792	Bial	4
AT1G06930	26	2	0.0057	0.929	6	17	0.5334	0.739	MEG_CxL	NA
AT1G06950	56	21	0.3118	0.727	15	31	0.9352	0.674	Bial	3
AT1G06960	535	177	0	0.751	187	414	0.3148	0.689	Bial	3
AT1G07010	58	15	0.0309	0.795	35	86	0.3742	0.711	Bial	NA
AT1G07020	266	105	0.0569	0.717	132	415	0	0.759	Bial	3
AT1G07040	156	38	0.0001	0.804	33	69	0.8696	0.676	Bial	3
AT1G07080	1369	531	0	0.721	651	1424	0.0873	0.686	Bial	4
AT1G07090	74	0	0	1	4	56	0	0.933	MEG	2
AT1G07110	115	52	0.5996	0.689	32	265	0	0.892	MEG_LxC	4
AT1G07128	96	68	0.04	0.585	76	109	0.0412	0.589	Bial	NA
AT1G07130	249	143	0.2321	0.635	161	292	0.3899	0.645	Bial	3
AT1G07135	825	120	0	0.873	99	373	0	0.79	poMEG	7
AT1G07140	1477	420	0	0.779	1250	1830	0	0.594	Bial	4
AT1G07220	46	2	0	0.958	7	55	0.0006	0.887	MEG	1
AT1G07230	38	24	0.4261	0.613	28	63	0.6694	0.692	Bial	0
AT1G07250	136	14	0	0.907	49	200	0	0.803	poMEG	4
AT1G07260	65	82	0	0.442	78	89	0.0006	0.533	poPEG	4
AT1G07300	171	9	0	0.95	30	64	0.8174	0.681	MEG_CxL	0
AT1G07310	158	26	0	0.859	62	106	0.3977	0.631	MEG_CxL	0
AT1G07350	2405	1192	0.8347	0.669	1346	3086	0.0001	0.696	Bial	4
AT1G07360	96	18	0.0002	0.842	35	58	0.4513	0.624	Bial	5
AT1G07370	257	180	0.001	0.588	167	179	0	0.517	Bial	4
AT1G07420	27	57	0	0.321	9	25	0.4686	0.735	PEG_CxL	NA
AT1G07470	108	7	0	0.939	34	67	0.9551	0.663	MEG_CxL	6
AT1G07473	99	45	0.646	0.688	55	50	0.0001	0.476	PEG_LxC	NA
AT1G07590	49	31	0.3587	0.612	27	107	0.0026	0.799	Bial	NA
AT1G07615	416	235	0.1723	0.639	127	404	0	0.761	Bial	4
AT1G07630	47	10	0.0181	0.825	20	0	0	0	PEG_LxC	10
AT1G07645	38	2	0.0003	0.95	11	9	0.0622	0.45	MEG_CxL	NA
AT1G07650	70	3	0	0.959	36	18	0	0.333	ColDom	0
AT1G07660	358	126	0.0013	0.74	150	705	0	0.825	Bial	6
AT1G07670	928	275	0	0.771	284	578	0.8504	0.671	Bial	6
AT1G07690	1189	776	0	0.605	807	1862	0.0015	0.698	Bial	10
AT1G07700	58	150	0	0.279	48	35	0	0.422	PEG	12
AT1G07710	64	47	0.0623	0.577	19	43	0.7153	0.694	Bial	NA
AT1G07720	83	9	0	0.902	4	99	0	0.961	MEG	9
AT1G07725	91	38	0.4068	0.705	52	54	0.0013	0.509	Bial	NA
AT1G07728	27	33	0.0007	0.45	26	54	0.9039	0.675	PEG_CxL	NA
AT1G07750	143	77	0.6495	0.65	41	120	0.0541	0.745	Bial	3
AT1G07770	22	5	0.1348	0.815	25	68	0.2458	0.731	Bial	NA
AT1G07790	360	346	0	0.51	134	486	0	0.784	Bial	NA
AT1G07830	533	194	0.0003	0.733	169	507	0	0.75	Bial	4
AT1G07840	204	84	0.1713	0.708	46	119	0.187	0.721	Bial	0
AT1G07870	320	138	0.1857	0.699	81	227	0.0159	0.737	Bial	3
AT1G07890	5862	1836	0	0.761	1763	4994	0	0.739	Bial	3
AT1G07930	2798	1196	0	0.701	1055	2626	0	0.713	Bial	5
AT1G07980	79	18	0.0036	0.814	27	80	0.1102	0.748	Bial	1
AT1G07990	152	88	0.3264	0.633	122	170	0.0045	0.582	Bial	3
AT1G08010	241	88	0.0178	0.733	90	426	0	0.826	Bial	4
AT1G08030	483	163	0	0.748	236	479	0.8859	0.67	Bial	4
AT1G08035	101	15	0	0.871	24	69	0.1704	0.742	MEG_CxL	4
AT1G08050	19	9	0.9133	0.679	9	18	1	0.667	Bial	NA
AT1G08060	81	19	0.0042	0.81	19	35	0.8194	0.648	Bial	4
AT1G08065	23	0	0.0013	1	12	24	1	0.667	MEG_CxL	NA
AT1G08110	16	7	0.8033	0.696	20	47	0.6162	0.701	Bial	4
AT1G08125	249	87	0.0065	0.741	110	280	0.0505	0.718	Bial	3
AT1G08130	15	17	0.0268	0.469	3	27	0.0123	0.9	Bial	4
AT1G08190	3035	923	0	0.767	1872	2791	0	0.599	Bial	4
AT1G08200	85	13	0.0001	0.867	55	38	0	0.409	ColDom	4
AT1G08220	84	39	0.7448	0.683	29	99	0.0184	0.773	Bial	0
AT1G08230	52	25	0.894	0.675	7	35	0.0361	0.833	Bial	NA
AT1G08260	38	10	0.0903	0.792	16	36	0.7523	0.692	Bial	4
AT1G08340	143	13	0	0.917	24	70	0.1521	0.745	MEG_CxL	NA
AT1G08370	131	39	0.0069	0.771	33	93	0.1277	0.738	Bial	0
AT1G08380	56	20	0.2405	0.737	24	30	0.1201	0.556	Bial	NA
AT1G08390	16	6	0.5991	0.727	3	29	0.0078	0.906	MEG_LxC	4
AT1G08400	52	12	0.0208	0.812	33	30	0.0028	0.476	PEG_LxC	4
AT1G08420	47	23	0.9453	0.671	29	50	0.5966	0.633	Bial	4
AT1G08450	37	0	0	1	33	4	0	0.108	ColDom	NA
AT1G08460	127	92	0.0107	0.58	46	223	0	0.829	Bial	5
AT1G08510	69	24	0.1597	0.742	1	98	0	0.99	MEG_LxC	0
AT1G08530	235	187	0	0.557	118	279	0.1746	0.703	Bial	4
AT1G08540	159	34	0	0.824	80	70	0	0.467	PEG_LxC	3
AT1G08620	30	5	0.0258	0.857	15	82	0.0005	0.845	Bial	4
AT1G08630	1534	580	0	0.726	650	962	0	0.597	Bial	3
AT1G08640	2814	616	0	0.82	989	1232	0	0.555	Bial	0
AT1G08650	470	96	0	0.83	138	322	0.1775	0.7	Bial	4
AT1G08680	237	32	0	0.881	108	79	0	0.422	ColDom	7
AT1G08700	415	330	0	0.557	236	552	0.0677	0.701	Bial	3
AT1G08710	73	35	0.864	0.676	20	77	0.0143	0.794	Bial	1
AT1G08720	233	97	0.1659	0.706	76	211	0.0238	0.735	Bial	4
AT1G08760	178	78	0.3867	0.695	127	184	0.0095	0.592	Bial	4
AT1G08770	123	4	0	0.969	90	37	0	0.291	ColDom	7
AT1G08780	806	250	0	0.763	467	715	0	0.605	Bial	3
AT1G08810	93	0	0	1	0	75	0	1	MEG	0
AT1G08830	975	305	0	0.762	290	776	0.0001	0.728	Bial	0
AT1G08840	516	173	0	0.749	125	396	0	0.76	Bial	4
AT1G08845	101	72	0.0314	0.584	39	84	0.7579	0.683	Bial	NA
AT1G08860	162	86	0.7002	0.653	94	238	0.0793	0.717	Bial	3
AT1G08880	122	32	0.0018	0.792	23	83	0.0195	0.783	Bial	NA
AT1G08890	80	6	0	0.93	16	9	0.0024	0.36	ColDom	NA
AT1G09000	115	23	0.0001	0.833	94	173	0.588	0.648	Bial	4
AT1G09020	17	4	0.2071	0.81	4	24	0.0517	0.857	Bial	4
AT1G09060	73	43	0.45	0.629	7	81	0	0.92	MEG_LxC	4
AT1G09070	47	5	0.0006	0.904	25	33	0.1593	0.569	MEG_CxL	3
AT1G09130	10	12	0.0503	0.455	8	13	0.7057	0.619	Bial	NA
AT1G09140	1058	440	0.0021	0.706	426	987	0.0195	0.699	Bial	NA
AT1G09160	322	27	0	0.923	132	33	0	0.2	ColDom	4
AT1G09190	8	34	0	0.19	3	24	0.0245	0.889	PEG_CxL	NA
AT1G09210	1021	277	0	0.787	470	1180	0.0001	0.715	Bial	4
AT1G09250	40	7	0.012	0.851	4	34	0.0057	0.895	MEG_LxC	NA
AT1G09270	75	46	0.3277	0.62	13	37	0.3393	0.74	Bial	NA
AT1G09280	394	186	0.572	0.679	150	322	0.5468	0.682	Bial	4
AT1G09290	292	168	0.1867	0.635	147	360	0.0599	0.71	Bial	4
AT1G09300	158	78	0.9404	0.669	43	165	0.0003	0.793	Bial	4
AT1G09320	87	41	0.7919	0.68	50	117	0.4248	0.701	Bial	4
AT1G09340	107	19	0	0.849	36	78	0.749	0.684	Bial	NA
AT1G09370	834	193	0	0.812	339	532	0.0011	0.611	Bial	3
AT1G09380	2128	1064	1	0.667	1547	3053	0.7293	0.664	Bial	1
AT1G09400	21	5	0.1637	0.808	0	29	0.0004	1	MEG_LxC	1
AT1G09415	616	187	0	0.767	954	2255	0	0.703	Bial	4
AT1G09420	1274	549	0.0061	0.699	506	1272	0	0.715	Bial	4
AT1G09421	746	322	0.0402	0.699	289	784	0	0.731	Bial	NA
AT1G09430	176	28	0	0.863	23	80	0.03	0.777	MEG_CxL	4
AT1G09440	95	0	0	1	0	23	0.0015	1	MEG	4
AT1G09450	734	530	0	0.581	591	1092	0.167	0.649	Bial	3
AT1G09460	70	38	0.7274	0.648	46	77	0.4111	0.626	Bial	5
AT1G09470	25	21	0.1032	0.543	26	50	0.9017	0.658	Bial	0
AT1G09490	149	76	0.9082	0.662	27	112	0.0012	0.806	Bial	2
AT1G09500	127	33	0.0013	0.794	44	97	0.659	0.688	Bial	0
AT1G09510	39	11	0.1189	0.78	11	37	0.1731	0.771	Bial	0
AT1G09520	30	4	0.0124	0.882	8	19	0.7414	0.704	Bial	1
AT1G09530	72	52	0.0598	0.581	12	52	0.023	0.812	Bial	4
AT1G09550	30	15	1	0.667	23	14	0.0005	0.378	PEG_LxC	4
AT1G09560	47	6	0.0013	0.887	17	18	0.084	0.514	MEG_CxL	7
AT1G09590	906	335	0	0.73	501	975	0.6838	0.661	Bial	0
AT1G09620	107	45	0.3852	0.704	32	73	0.6059	0.695	Bial	4
AT1G09640	100	37	0.1512	0.73	49	109	0.6073	0.69	Bial	NA
AT1G09650	52	43	0.0212	0.547	0	26	0.0007	1	MEG_LxC	4
AT1G09660	127	22	0	0.852	107	88	0	0.451	ColDom	1
AT1G09680	189	15	0	0.926	13	29	0.7941	0.69	MEG_CxL	3
AT1G09690	50	10	0.0102	0.833	13	41	0.2009	0.759	Bial	1
AT1G09700	59	6	0.0001	0.908	27	30	0.0401	0.526	MEG_CxL	4
AT1G09710	11	14	0.0249	0.44	17	6	0.0001	0.261	PEG_LxC	1
AT1G09730	143	81	0.4263	0.638	84	167	0.9726	0.665	Bial	4
AT1G09740	32	3	0.0034	0.914	17	7	0.0003	0.292	ColDom	4
AT1G09750	57	11	0.0047	0.838	0	30	0.0003	1	poMEG	NA
AT1G09760	527	96	0	0.846	195	243	0	0.555	Bial	4
AT1G09770	2299	968	0	0.704	2162	4630	0.0156	0.682	Bial	4
AT1G09780	708	384	0.2461	0.648	360	866	0.0063	0.706	Bial	3
AT1G09790	53	33	0.3774	0.616	49	33	0	0.402	PEG_LxC	8
AT1G09794	61	20	0.1306	0.753	47	34	0	0.42	PEG_LxC	9
AT1G09795	731	243	0	0.751	392	456	0	0.538	Bial	4
AT1G09810	261	176	0.0037	0.597	108	166	0.0519	0.606	Bial	4
AT1G09815	959	478	0.9637	0.667	474	951	0.965	0.667	Bial	3
AT1G09820	124	46	0.111	0.729	35	112	0.0245	0.762	Bial	4
AT1G09830	95	10	0	0.905	101	92	0	0.477	ColDom	4
AT1G09840	393	133	0.0002	0.747	153	335	0.4256	0.686	Bial	3
AT1G09870	35	8	0.0578	0.814	18	8	0.0003	0.308	PEG_LxC	4
AT1G09880	23	30	0.0007	0.434	13	19	0.4539	0.594	PEG_CxL	NA
AT1G09900	56	52	0.002	0.519	52	54	0.0013	0.509	Bial	4
AT1G09910	329	16	0	0.954	50	56	0.005	0.528	MEG_CxL	4
AT1G09920	704	223	0	0.759	207	481	0.1041	0.699	Bial	4
AT1G09930	103	33	0.037	0.757	26	36	0.2032	0.581	Bial	4
AT1G09940	210	47	0	0.817	115	116	0	0.502	Bial	3
AT1G09960	50	25	1	0.667	14	52	0.0577	0.788	Bial	3
AT1G09970	59	21	0.2234	0.738	13	118	0	0.901	MEG_LxC	4
AT1G09980	130	56	0.4071	0.699	88	156	0.4369	0.639	Bial	4
AT1G10010	148	78	0.749	0.655	61	201	0.0013	0.767	Bial	NA
AT1G10020	42	4	0.0008	0.913	2	43	0.0001	0.956	MEG	0
AT1G10030	86	31	0.1516	0.735	88	147	0.2389	0.626	Bial	4
AT1G10050	718	349	0.7106	0.673	415	852	0.7229	0.672	Bial	5
AT1G10060	78	0	0	1	1	94	0	0.989	MEG	4
AT1G10070	246	69	0	0.781	46	122	0.1439	0.726	Bial	3
AT1G10090	304	102	0.0009	0.749	186	220	0	0.542	Bial	4
AT1G10095	97	24	0.003	0.802	52	97	0.7433	0.651	Bial	4
AT1G10110	46	43	0.0048	0.517	5	98	0	0.951	MEG_LxC	4
AT1G10120	227	43	0	0.841	44	238	0	0.844	Bial	4
AT1G10130	193	100	0.8071	0.659	99	131	0.0037	0.57	Bial	4
AT1G10140	31	6	0.04	0.838	0	222	0	1	MEG_LxC	NA
AT1G10290	172	181	0	0.487	130	224	0.2329	0.633	PEG_CxL	NA
AT1G10360	868	309	0	0.737	256	746	0	0.745	Bial	1
AT1G10490	856	244	0	0.778	349	667	0.564	0.656	Bial	4
AT1G10500	102	36	0.0964	0.739	65	118	0.6022	0.645	Bial	1
AT1G10510	26	1	0.002	0.963	8	28	0.2111	0.778	MEG_CxL	4
AT1G10520	29	23	0.1265	0.558	11	34	0.2669	0.756	Bial	4
AT1G10522	265	122	0.5068	0.685	119	262	0.4573	0.688	Bial	3
AT1G10540	1452	4137	0	0.26	328	10285	0	0.969	LerDom	3
AT1G10590	85	75	0.0006	0.531	58	197	0.0008	0.773	Bial	NA
AT1G10670	243	80	0.002	0.752	55	212	0	0.794	Bial	4
AT1G10680	16	20	0.0079	0.444	13	32	0.5984	0.711	PEG_CxL	3
AT1G10710	39	24	0.4789	0.619	20	44	0.7772	0.688	Bial	NA
AT1G10720	42	7	0.0079	0.857	18	52	0.2332	0.743	MEG_CxL	4
AT1G10730	84	10	0	0.894	50	105	0.8227	0.677	MEG_CxL	4
AT1G10740	120	52	0.4449	0.698	69	46	0	0.4	PEG_LxC	NA
AT1G10770	446	40	0	0.918	122	2	0	0.016	ColDom	0
AT1G10820	127	93	0.0083	0.577	38	122	0.018	0.762	Bial	8
AT1G10830	44	16	0.3264	0.733	15	45	0.2269	0.75	Bial	4
AT1G10890	1916	844	0.0038	0.694	1437	3759	0	0.723	Bial	7
AT1G10910	773	50	0	0.939	265	55	0	0.172	ColDom	4
AT1G10920	21	4	0.0902	0.84	21	12	0.0005	0.364	PEG_LxC	NA
AT1G10930	74	55	0.0372	0.574	48	113	0.4156	0.702	Bial	4
AT1G10940	332	60	0	0.847	112	226	0.9513	0.669	Bial	0
AT1G10950	57	17	0.081	0.77	28	24	0.0035	0.462	PEG_LxC	4
AT1G10970	42	10	0.0452	0.808	18	75	0.0081	0.806	Bial	4
AT1G11020	115	46	0.247	0.714	39	126	0.0149	0.764	Bial	3
AT1G11070	3297	1482	0.0013	0.69	1378	2229	0	0.618	Bial	4
AT1G11100	76	32	0.4706	0.704	17	111	0	0.867	MEG_LxC	4
AT1G11145	62	5	0	0.925	23	35	0.3777	0.603	MEG_CxL	1
AT1G11150	1340	75	0	0.947	1085	169	0	0.135	ColDom	NA
AT1G11170	24	13	0.8446	0.649	21	35	0.5809	0.625	Bial	4
AT1G11175	433	143	0	0.752	289	198	0	0.407	PEG_LxC	NA
AT1G11180	545	168	0	0.764	306	517	0.032	0.628	Bial	4
AT1G11220	42	134	0	0.239	16	80	0.0012	0.833	PEG_CxL	10
AT1G11240	837	366	0.047	0.696	506	991	0.7572	0.662	Bial	7
AT1G11260	238	14	0	0.944	0	181	0	1	MEG	5
AT1G11280	91	15	0.0001	0.858	58	51	0	0.468	ColDom	3
AT1G11320	8	16	0.001	0.333	10	19	0.9188	0.655	PEG_CxL	0
AT1G11350	25	0	0.0008	1	3	26	0.0156	0.897	MEG_CxL	4
AT1G11360	116	46	0.2274	0.716	14	80	0.0004	0.851	MEG_LxC	0
AT1G11410	180	15	0	0.923	21	70	0.0595	0.769	MEG_CxL	1
AT1G11420	61	62	0.0001	0.496	49	94	0.8534	0.657	PEG_CxL	0
AT1G11440	43	1	0	0.977	9	40	0.0425	0.816	MEG_CxL	NA
AT1G11475	215	108	0.9756	0.666	77	228	0.0054	0.748	Bial	0
AT1G11480	332	131	0.0323	0.717	105	334	0.0001	0.761	Bial	4
AT1G11482	30	84	0	0.263	87	52	0	0.374	PEG	NA
AT1G11530	49	31	0.3587	0.612	4	31	0.0111	0.886	Bial	3
AT1G11540	71	12	0.0005	0.855	24	92	0.0075	0.793	poMEG	3
AT1G11580	29	3	0.0069	0.906	3	25	0.0195	0.893	MEG_CxL	0
AT1G11593	53	13	0.0285	0.803	16	78	0.0018	0.83	Bial	9
AT1G11660	26	38	0	0.406	18	24	0.2493	0.571	PEG_CxL	12
AT1G11670	61	19	0.094	0.762	38	30	0.0002	0.441	PEG_LxC	8
AT1G11930	901	425	0.3778	0.679	439	924	0.4506	0.678	Bial	NA
AT1G11950	125	141	0	0.47	38	120	0.023	0.759	PEG_CxL	1
AT1G11960	201	84	0.2095	0.705	91	197	0.6033	0.684	Bial	0
AT1G12000	710	258	0	0.733	327	644	0.8596	0.663	Bial	3
AT1G12010	21	4	0.0902	0.84	15	13	0.0379	0.464	Bial	1
AT1G12190	155	141	0	0.524	134	215	0.0691	0.616	Bial	6
AT1G12200	1036	171	0	0.858	286	231	0	0.447	ColDom	3
AT1G12210	39	0	0	1	33	5	0	0.132	ColDom	4
AT1G12230	357	64	0	0.848	151	128	0	0.459	PEG_LxC	4
AT1G12240	278	97	0.0039	0.741	88	306	0	0.777	Bial	7
AT1G12244	207	92	0.4031	0.692	102	235	0.2967	0.697	Bial	0
AT1G12280	28	0	0.0004	1	6	20	0.3357	0.769	MEG_CxL	4
AT1G12290	111	24	0.0003	0.822	46	107	0.4635	0.699	Bial	5
AT1G12300	103	18	0	0.851	18	90	0.0006	0.833	poMEG	4
AT1G12310	27	5	0.0487	0.844	3	29	0.0078	0.906	MEG_LxC	0
AT1G12350	189	147	0.0001	0.562	90	171	0.7513	0.655	Bial	4
AT1G12360	1016	232	0	0.814	409	501	0	0.551	Bial	3
AT1G12370	41	23	0.7049	0.641	7	49	0.002	0.875	MEG_LxC	1
AT1G12380	46	9	0.0124	0.836	1	47	0	0.979	MEG_LxC	4
AT1G12400	235	2	0	0.992	118	23	0	0.163	ColDom	3
AT1G12410	253	19	0	0.93	107	108	0	0.502	MEG_CxL	0
AT1G12430	15	16	0.045	0.484	3	33	0.0031	0.917	MEG_LxC	4
AT1G12440	17	7	0.7106	0.708	8	24	0.3882	0.75	Bial	3
AT1G12470	94	54	0.472	0.635	67	113	0.3361	0.628	Bial	4
AT1G12500	159	16	0	0.909	44	196	0	0.817	poMEG	1
AT1G12520	519	67	0	0.886	161	261	0.0563	0.618	MEG_CxL	3
AT1G12530	70	4	0	0.946	20	47	0.6162	0.701	MEG_CxL	3
AT1G12550	719	160	0	0.818	147	532	0	0.784	Bial	4
AT1G12620	72	21	0.0409	0.774	10	29	0.3787	0.744	Bial	10
AT1G12630	105	25	0.0013	0.808	19	58	0.1504	0.753	Bial	NA
AT1G12640	237	24	0	0.908	100	83	0	0.454	ColDom	4
AT1G12650	516	55	0	0.904	292	145	0	0.332	ColDom	3
AT1G12665	191	117	0.1116	0.62	118	182	0.0443	0.607	Bial	NA
AT1G12670	291	115	0.047	0.717	113	281	0.0762	0.713	Bial	NA
AT1G12680	123	50	0.265	0.711	93	212	0.362	0.695	Bial	3
AT1G12730	273	81	0.0001	0.771	184	317	0.1505	0.633	Bial	4
AT1G12750	293	55	0	0.842	39	216	0	0.847	Bial	4
AT1G12760	178	155	0	0.535	105	283	0.0158	0.729	Bial	4
AT1G12770	60	34	0.6119	0.638	26	109	0.0012	0.807	Bial	4
AT1G12790	189	44	0	0.811	75	75	0	0.5	PEG_LxC	4
AT1G12800	116	80	0.0389	0.592	52	231	0	0.816	Bial	1
AT1G12805	19	6	0.3778	0.76	20	32	0.5066	0.615	Bial	0
AT1G12810	691	226	0	0.754	296	772	0.0003	0.723	Bial	1
AT1G12820	209	46	0	0.82	51	223	0	0.814	Bial	4
AT1G12830	5775	2617	0.0001	0.688	6243	13366	0	0.682	Bial	4
AT1G12840	381	110	0	0.776	222	364	0.0324	0.621	Bial	4
AT1G12850	157	42	0.0005	0.789	61	108	0.5198	0.639	Bial	1
AT1G12855	110	91	0.0007	0.547	162	130	0	0.445	poPEG	NA
AT1G12860	381	358	0	0.516	157	224	0.0024	0.588	Bial	4
AT1G12880	488	12	0	0.976	8	161	0	0.953	MEG	0
AT1G12930	195	71	0.0324	0.733	118	181	0.0399	0.605	Bial	4
AT1G12970	281	113	0.07	0.713	140	201	0.005	0.589	Bial	0
AT1G13030	73	69	0.0003	0.514	19	72	0.0205	0.791	Bial	NA
AT1G13060	581	175	0	0.769	210	523	0.0131	0.714	Bial	4
AT1G13120	2870	983	0	0.745	3405	7052	0.1345	0.674	Bial	0
AT1G13140	122	60	0.9315	0.67	32	62	0.9117	0.66	Bial	4
AT1G13150	252	71	0	0.78	61	116	0.8	0.655	Bial	4
AT1G13180	36	11	0.1888	0.766	17	18	0.084	0.514	Bial	3
AT1G13200	63	10	0.0008	0.863	26	74	0.1658	0.74	MEG_CxL	NA
AT1G13210	93	8	0	0.921	4	30	0.0139	0.882	MEG_CxL	NA
AT1G13220	2223	580	0	0.793	2406	2896	0	0.546	Bial	0
AT1G13250	122	13	0	0.904	8	135	0	0.944	MEG	1
AT1G13270	213	85	0.1055	0.715	74	207	0.0222	0.737	Bial	4
AT1G13280	270	23	0	0.922	160	70	0	0.304	ColDom	5
AT1G13320	95	23	0.0026	0.805	49	96	0.9274	0.662	Bial	0
AT1G13340	44	6	0.0025	0.88	4	20	0.1201	0.833	MEG_CxL	0
AT1G13360	142	18	0	0.888	1	54	0	0.982	MEG	NA
AT1G13390	106	20	0.0001	0.841	108	1	0	0.009	PEG_LxC	11
AT1G13440	2658	1173	0.0007	0.694	1055	2415	0.0006	0.696	Bial	3
AT1G13448	196	94	0.7786	0.676	80	101	0.0039	0.558	Bial	NA
AT1G13450	678	247	0	0.733	194	325	0.0769	0.626	Bial	4
AT1G13460	85	11	0	0.885	11	47	0.0336	0.81	MEG_CxL	4
AT1G13570	189	96	0.9187	0.663	79	190	0.2232	0.706	Bial	3
AT1G13590	119	78	0.0856	0.604	132	507	0	0.793	Bial	0
AT1G13700	183	42	0	0.813	35	184	0	0.84	Bial	NA
AT1G13860	32	3	0.0034	0.914	0	23	0.0015	1	MEG	4
AT1G13870	60	32	0.8033	0.652	45	83	0.7227	0.648	Bial	0
AT1G13880	78	51	0.1731	0.605	37	107	0.0786	0.743	Bial	3
AT1G13910	99	90	0.0001	0.524	22	98	0.0011	0.817	Bial	3
AT1G13940	54	35	0.2805	0.607	7	21	0.4221	0.75	Bial	0
AT1G13950	361	43	0	0.894	295	136	0	0.316	ColDom	0
AT1G13960	33	2	0.001	0.943	13	9	0.0184	0.409	MEG_CxL	NA
AT1G13970	49	0	0	1	21	2	0	0.087	ColDom	4
AT1G14000	30	8	0.1418	0.789	3	25	0.0195	0.893	Bial	3
AT1G14010	491	163	0	0.751	202	507	0.0115	0.715	Bial	3
AT1G14020	340	75	0	0.819	111	147	0.0021	0.57	Bial	1
AT1G14030	194	36	0	0.843	72	136	0.7523	0.654	Bial	3
AT1G14040	98	7	0	0.933	1	31	0.0007	0.969	MEG	4
AT1G14070	77	32	0.4355	0.706	35	104	0.0644	0.748	Bial	0
AT1G14130	33	5	0.0135	0.868	0	26	0.0007	1	MEG_LxC	0
AT1G14180	94	27	0.0161	0.777	3	26	0.0156	0.897	Bial	NA
AT1G14270	26	17	0.4449	0.605	16	19	0.1662	0.543	Bial	4
AT1G14290	116	66	0.4578	0.637	58	100	0.44	0.633	Bial	4
AT1G14300	19	4	0.1376	0.826	0	30	0.0003	1	MEG_LxC	3
AT1G14310	321	88	0	0.785	105	244	0.2583	0.699	Bial	4
AT1G14315	18	3	0.0878	0.857	9	13	0.5238	0.591	Bial	NA
AT1G14320	1321	520	0	0.718	629	1360	0.1489	0.684	Bial	0
AT1G14330	214	85	0.0976	0.716	83	241	0.0063	0.744	Bial	2
AT1G14350	162	15	0	0.915	17	135	0	0.888	MEG	3
AT1G14370	209	1	0	0.995	6	116	0	0.951	MEG	NA
AT1G14380	835	11	0	0.987	15	442	0	0.967	MEG	3
AT1G14410	147	26	0	0.85	49	80	0.3306	0.62	MEG_CxL	4
AT1G14420	193	72	0.0483	0.728	121	3	0	0.024	PEG_LxC	NA
AT1G14460	15	18	0.0156	0.455	0	26	0.0007	1	MEG_LxC	NA
AT1G14560	493	136	0	0.784	166	420	0.018	0.717	Bial	1
AT1G14570	234	162	0.0025	0.591	41	359	0	0.898	MEG_LxC	4
AT1G14580	60	14	0.0138	0.811	0	24	0.0012	1	MEG_LxC	0
AT1G14590	168	49	0.0015	0.774	38	119	0.026	0.758	Bial	6
AT1G14610	130	22	0	0.855	42	116	0.1053	0.734	MEG_CxL	0
AT1G14890	130	3	0	0.977	48	71	0.1479	0.597	MEG_CxL	NA
AT1G14900	38	95	0	0.286	75	15	0	0.167	PEG	11
AT1G14970	167	30	0	0.848	68	75	0.0007	0.524	Bial	0
AT1G14980	341	158	0.4853	0.683	157	291	0.5156	0.65	Bial	4
AT1G14990	338	142	0.1095	0.704	249	308	0	0.553	Bial	NA
AT1G15020	101	64	0.1755	0.612	28	113	0.0015	0.801	Bial	4
AT1G15030	163	38	0	0.811	31	22	0.0003	0.415	PEG_LxC	3
AT1G15080	113	11	0	0.911	35	17	0	0.327	ColDom	1
AT1G15100	326	108	0.0004	0.751	136	271	0.9791	0.666	Bial	0
AT1G15110	63	40	0.287	0.612	10	31	0.2877	0.756	Bial	NA
AT1G15120	218	82	0.0404	0.727	85	161	0.7432	0.654	Bial	4
AT1G15130	1086	411	0	0.725	488	1075	0.1117	0.688	Bial	3
AT1G15140	30	28	0.0243	0.517	18	75	0.0081	0.806	Bial	3
AT1G15150	179	29	0	0.861	42	150	0.0017	0.781	poMEG	NA
AT1G15170	42	13	0.1637	0.764	11	35	0.232	0.761	Bial	3
AT1G15180	33	28	0.0536	0.541	14	58	0.0216	0.806	Bial	0
AT1G15190	108	7	0	0.939	64	158	0.2079	0.712	MEG_CxL	4
AT1G15200	11143	5039	0	0.689	7171	17455	0	0.709	Bial	4
AT1G15215	87	27	0.0423	0.763	79	121	0.0954	0.605	Bial	0
AT1G15240	784	144	0	0.845	259	533	0.7616	0.673	Bial	NA
AT1G15250	222	91	0.1436	0.709	109	212	0.8533	0.66	Bial	4
AT1G15270	231	14	0	0.943	68	30	0	0.306	ColDom	3
AT1G15280	1717	533	0	0.763	1147	2390	0.3206	0.676	Bial	1
AT1G15290	2562	1205	0.1078	0.68	1036	2860	0	0.734	Bial	3
AT1G15300	130	52	0.2166	0.714	41	91	0.6471	0.689	Bial	NA
AT1G15310	71	24	0.1261	0.747	20	29	0.335	0.592	Bial	NA
AT1G15320	16	7	0.8033	0.696	4	35	0.0045	0.897	MEG_LxC	4
AT1G15340	86	28	0.0661	0.754	90	207	0.3359	0.697	Bial	4
AT1G15350	48	32	0.2534	0.6	50	140	0.0627	0.737	Bial	NA
AT1G15370	16	20	0.0079	0.444	13	11	0.0486	0.458	PEG_CxL	NA
AT1G15400	138	39	0.0026	0.78	56	152	0.076	0.731	Bial	4
AT1G15405	2077	642	0	0.764	2068	2927	0	0.586	Bial	NA
AT1G15410	46	20	0.6506	0.697	50	60	0.0129	0.545	Bial	4
AT1G15430	310	79	0	0.797	149	187	0.0001	0.557	Bial	0
AT1G15440	126	77	0.2071	0.621	70	107	0.1154	0.605	Bial	0
AT1G15470	450	91	0	0.832	207	400	0.7459	0.659	Bial	3
AT1G15480	71	14	0.0018	0.835	45	59	0.0503	0.567	Bial	4
AT1G15490	206	78	0.0517	0.725	52	194	0.0001	0.789	Bial	3
AT1G15510	77	21	0.0194	0.786	45	69	0.2196	0.605	Bial	0
AT1G15600	31	0	0.0002	1	7	20	0.4876	0.741	MEG_CxL	NA
AT1G15660	857	240	0	0.781	414	608	0	0.595	Bial	3
AT1G15670	24	23	0.0347	0.511	15	44	0.2575	0.746	Bial	5
AT1G15680	18	10	0.8213	0.643	3	42	0.0004	0.933	MEG_LxC	NA
AT1G15690	216	79	0.0259	0.732	43	220	0	0.837	Bial	4
AT1G15710	20	0	0.0029	1	12	11	0.0833	0.478	MEG_CxL	3
AT1G15720	84	84	0	0.5	57	113	0.9662	0.665	PEG_CxL	4
AT1G15730	58	49	0.0103	0.542	21	68	0.0779	0.764	Bial	3
AT1G15750	1022	419	0.0012	0.709	395	961	0.0022	0.709	Bial	4
AT1G15780	28	10	0.4152	0.737	5	22	0.1448	0.815	Bial	4
AT1G15800	400	117	0	0.774	186	305	0.0517	0.621	Bial	3
AT1G15810	419	106	0	0.798	140	301	0.5516	0.683	Bial	3
AT1G15820	563	139	0	0.802	122	312	0.0347	0.719	Bial	0
AT1G15860	247	151	0.0716	0.621	178	374	0.6553	0.678	Bial	4
AT1G15870	101	136	0	0.426	21	238	0	0.919	LerDom	3
AT1G15880	258	116	0.3978	0.69	112	216	0.8039	0.659	Bial	4
AT1G15900	38	48	0	0.442	14	58	0.0216	0.806	PEG_CxL	5
AT1G15910	50	11	0.0178	0.82	54	1	0	0.018	PEG_LxC	3
AT1G15920	439	253	0.0973	0.634	260	484	0.4232	0.651	Bial	3
AT1G15930	639	351	0.1984	0.645	227	663	0	0.745	Bial	1
AT1G15950	233	4	0	0.983	8	199	0	0.961	MEG	1
AT1G15960	169	2	0	0.988	8	180	0	0.957	MEG	3
AT1G15970	161	25	0	0.866	77	87	0.0005	0.53	MEG_CxL	3
AT1G16000	56	98	0	0.364	49	44	0.0002	0.473	PEG	3
AT1G16010	54	19	0.231	0.74	38	59	0.2853	0.608	Bial	4
AT1G16030	8	12	0.018	0.4	5	16	0.4265	0.762	Bial	4
AT1G16040	892	517	0.0122	0.633	491	1187	0.0009	0.707	Bial	3
AT1G16080	426	280	0.0007	0.603	189	498	0.0026	0.725	Bial	3
AT1G16180	103	19	0.0001	0.844	18	91	0.0005	0.835	Bial	4
AT1G16210	824	324	0.0005	0.718	427	829	0.6824	0.66	Bial	3
AT1G16240	14	7	1	0.667	19	12	0.0021	0.387	PEG_LxC	NA
AT1G16270	116	4	0	0.967	21	83	0.0085	0.798	poMEG	0
AT1G16280	43	14	0.2018	0.754	37	72	0.9176	0.661	Bial	4
AT1G16300	69	40	0.5128	0.633	25	68	0.2458	0.731	Bial	4
AT1G16350	163	56	0.0229	0.744	50	239	0	0.827	Bial	3
AT1G16390	177	7	0	0.962	0	133	0	1	MEG	3
AT1G16410	25	4	0.038	0.862	9	21	0.7548	0.7	Bial	5
AT1G16500	253	68	0	0.788	102	275	0.0173	0.729	Bial	0
AT1G16540	513	171	0	0.75	218	262	0	0.546	Bial	3
AT1G16550	95	41	0.4869	0.699	26	115	0.0004	0.816	Bial	NA
AT1G16560	475	148	0	0.762	185	266	0.0012	0.59	Bial	3
AT1G16570	331	122	0.0066	0.731	159	300	0.6219	0.654	Bial	4
AT1G16590	299	67	0	0.817	86	123	0.028	0.589	Bial	3
AT1G16610	3955	344	0	0.92	1936	851	0	0.305	ColDom	4
AT1G16630	14	6	0.7892	0.7	28	49	0.6406	0.636	Bial	NA
AT1G16650	31	26	0.069	0.544	27	84	0.068	0.757	Bial	4
AT1G16700	312	173	0.3282	0.643	178	367	0.7906	0.673	Bial	0
AT1G16720	413	226	0.3285	0.646	130	209	0.0763	0.617	Bial	0
AT1G16730	44	33	0.1031	0.571	41	7	0	0.146	PEG_LxC	NA
AT1G16750	211	36	0	0.854	34	97	0.1071	0.74	MEG_CxL	1
AT1G16770	23	7	0.2967	0.767	2	55	0	0.965	MEG_LxC	NA
AT1G16780	220	150	0.0057	0.595	45	346	0	0.885	MEG_LxC	4
AT1G16790	59	87	0	0.404	73	112	0.1123	0.605	PEG_CxL	4
AT1G16800	204	153	0.0003	0.571	233	593	0.0037	0.718	Bial	1
AT1G16825	93	75	0.0034	0.554	27	156	0	0.852	MEG_LxC	NA
AT1G16840	932	237	0	0.797	419	812	0.6661	0.66	Bial	4
AT1G16880	84	12	0	0.875	3	34	0.0024	0.919	MEG	4
AT1G16890	105	104	0	0.502	70	127	0.5847	0.645	Bial	4
AT1G16980	182	218	0	0.455	258	688	0.0002	0.727	PEG_CxL	4
AT1G17020	18	16	0.1192	0.529	40	75	0.7928	0.652	Bial	5
AT1G17040	268	117	0.2696	0.696	216	263	0	0.549	Bial	3
AT1G17050	79	59	0.0287	0.572	33	72	0.7385	0.686	Bial	4
AT1G17060	52	22	0.5649	0.703	18	39	0.8238	0.684	Bial	0
AT1G17070	28	17	0.5803	0.622	11	57	0.0054	0.838	Bial	4
AT1G17100	24	7	0.2516	0.774	6	26	0.1161	0.812	Bial	NA
AT1G17110	13	7	0.8961	0.65	9	16	0.823	0.64	Bial	4
AT1G17120	128	47	0.0941	0.731	37	129	0.0051	0.777	Bial	3
AT1G17130	45	35	0.0676	0.562	52	83	0.262	0.615	Bial	4
AT1G17145	171	279	0	0.38	198	212	0	0.517	poPEG	12
AT1G17150	73	18	0.0101	0.802	16	19	0.1662	0.543	Bial	NA
AT1G17160	120	8	0	0.938	59	28	0	0.322	ColDom	3
AT1G17170	87	8	0	0.916	9	34	0.1218	0.791	MEG_CxL	4
AT1G17190	306	251	0	0.549	227	198	0	0.466	poPEG	4
AT1G17200	1445	53	0	0.965	2	582	0	0.997	MEG	1
AT1G17210	188	29	0	0.866	14	152	0	0.916	MEG	4
AT1G17220	299	208	0.0005	0.59	172	324	0.5973	0.653	Bial	4
AT1G17230	48	31	0.3183	0.608	61	4	0	0.062	PEG_LxC	0
AT1G17240	70	6	0	0.921	39	10	0	0.204	ColDom	4
AT1G17290	533	104	0	0.837	247	300	0	0.548	Bial	4
AT1G17330	207	32	0	0.866	57	152	0.0938	0.727	MEG_CxL	6
AT1G17350	47	9	0.0102	0.839	13	48	0.0712	0.787	Bial	5
AT1G17370	51	6	0.0005	0.895	14	18	0.2732	0.562	MEG_CxL	NA
AT1G17420	16	24	0.0007	0.4	36	21	0	0.368	PEG	2
AT1G17430	126	17	0	0.881	78	65	0	0.455	ColDom	3
AT1G17455	75	22	0.0386	0.773	29	61	0.8616	0.678	Bial	4
AT1G17460	185	126	0.0118	0.595	84	216	0.0761	0.72	Bial	4
AT1G17500	82	0	0	1	3	34	0.0024	0.919	MEG	1
AT1G17540	56	17	0.0935	0.767	53	0	0	0	PEG_LxC	NA
AT1G17550	491	87	0	0.849	325	362	0	0.527	Bial	NA
AT1G17560	154	92	0.2203	0.626	71	70	0.0001	0.496	PEG_LxC	7
AT1G17580	166	101	0.1547	0.622	170	38	0	0.183	PEG_LxC	5
AT1G17590	181	276	0	0.396	72	334	0	0.823	PEG_CxL	4
AT1G17640	47	5	0.0006	0.904	24	3	0	0.111	ColDom	0
AT1G17650	37	7	0.022	0.841	24	25	0.0334	0.51	Bial	1
AT1G17665	47	14	0.1142	0.77	17	53	0.1517	0.757	Bial	0
AT1G17680	272	35	0	0.886	109	215	0.9272	0.664	MEG_CxL	4
AT1G17690	429	149	0.0003	0.742	203	436	0.4745	0.682	Bial	5
AT1G17720	651	223	0	0.745	220	595	0.0003	0.73	Bial	4
AT1G17730	37	8	0.0396	0.822	21	35	0.5809	0.625	Bial	3
AT1G17745	335	0	0	1	3	409	0	0.993	MEG	0
AT1G17750	22	2	0.015	0.917	2	21	0.0212	0.913	Bial	4
AT1G17760	571	84	0	0.872	243	167	0	0.407	ColDom	4
AT1G17770	135	168	0	0.446	243	32	0	0.116	PEG	12
AT1G17780	1075	1997	0	0.35	3080	932	0	0.232	PEG	12
AT1G17790	86	33	0.241	0.723	51	32	0	0.386	PEG_LxC	12
AT1G17810	303	51	0	0.856	48	61	0.0298	0.56	MEG_CxL	12
AT1G17820	822	500	0.0011	0.622	521	1459	0	0.737	Bial	4
AT1G17830	222	52	0	0.81	12	44	0.088	0.786	Bial	1
AT1G17840	651	84	0	0.886	119	496	0	0.807	poMEG	3
AT1G17850	373	124	0.0002	0.751	155	365	0.1265	0.702	Bial	4
AT1G17860	48	4	0.0002	0.923	19	23	0.1439	0.548	MEG_CxL	3
AT1G17870	80	12	0.0001	0.87	42	25	0	0.373	ColDom	4
AT1G17880	1874	695	0	0.729	800	2042	0	0.719	Bial	4
AT1G17890	316	64	0	0.832	120	199	0.1474	0.624	Bial	4
AT1G17920	128	88	0.0315	0.593	87	166	0.7761	0.656	Bial	4
AT1G17930	239	206	0	0.537	122	432	0	0.78	Bial	4
AT1G17940	255	58	0	0.815	59	164	0.0471	0.735	Bial	4
AT1G17960	18	23	0.0036	0.439	27	30	0.0401	0.526	PEG_CxL	6
AT1G17970	2290	1010	0.0017	0.694	1317	2449	0.0524	0.65	Bial	3
AT1G18060	205	70	0.0093	0.745	84	315	0	0.789	Bial	0
AT1G18080	294	192	0.0067	0.605	139	250	0.3867	0.643	Bial	0
AT1G18090	78	49	0.2573	0.614	48	53	0.005	0.525	Bial	5
AT1G18100	86	49	0.5213	0.637	48	61	0.0298	0.56	Bial	0
AT1G18150	533	139	0	0.793	230	357	0.0053	0.608	Bial	4
AT1G18180	71	6	0	0.922	18	27	0.4149	0.6	MEG_CxL	4
AT1G18260	419	145	0.0003	0.743	289	515	0.1614	0.641	Bial	3
AT1G18270	93	34	0.1517	0.732	30	114	0.0031	0.792	Bial	7
AT1G18300	36	11	0.1888	0.766	26	10	0	0.278	PEG_LxC	7
AT1G18360	119	28	0.0005	0.81	19	81	0.0048	0.81	Bial	4
AT1G18370	307	201	0.005	0.604	91	344	0	0.791	Bial	6
AT1G18410	75	30	0.355	0.714	79	107	0.0148	0.575	Bial	NA
AT1G18420	105	6	0	0.946	2	18	0.0433	0.9	MEG_CxL	4
AT1G18440	37	8	0.0396	0.822	21	18	0.0121	0.462	Bial	4
AT1G18450	392	244	0.0117	0.616	178	278	0.0174	0.61	Bial	4
AT1G18480	118	38	0.0266	0.756	95	147	0.077	0.607	Bial	4
AT1G18485	77	9	0	0.895	30	97	0.0336	0.764	MEG_CxL	2
AT1G18500	215	67	0.0013	0.762	92	172	0.6674	0.652	Bial	2
AT1G18520	47	15	0.1635	0.758	27	35	0.1264	0.565	Bial	6
AT1G18540	1032	317	0	0.765	535	822	0	0.606	Bial	4
AT1G18550	105	63	0.3039	0.625	11	103	0	0.904	MEG_LxC	NA
AT1G18690	154	39	0.0002	0.798	48	120	0.2493	0.714	Bial	0
AT1G18700	120	28	0.0004	0.811	19	114	0	0.857	poMEG	4
AT1G18710	254	0	0	1	17	110	0	0.866	MEG	7
AT1G18730	574	177	0	0.764	197	344	0.1763	0.636	Bial	4
AT1G18735	49	26	0.8364	0.653	8	22	0.5119	0.733	Bial	NA
AT1G18740	33	20	0.5513	0.623	11	54	0.0095	0.831	Bial	3
AT1G18750	170	6	0	0.966	17	16	0.0432	0.485	MEG_CxL	4
AT1G18760	116	0	0	1	3	97	0	0.97	MEG	0
AT1G18773	472	160	0	0.747	112	181	0.1104	0.618	Bial	0
AT1G18800	68	11	0.0005	0.861	26	29	0.0455	0.527	MEG_CxL	3
AT1G18850	56	17	0.0935	0.767	28	43	0.3435	0.606	Bial	NA
AT1G18870	15	12	0.2696	0.556	5	17	0.3606	0.773	Bial	2
AT1G18900	94	51	0.6864	0.648	15	90	0.0001	0.857	MEG_LxC	4
AT1G18910	35	20	0.6816	0.636	1	44	0	0.978	MEG_LxC	4
AT1G18940	61	52	0.0072	0.54	61	9	0	0.129	poPEG	4
AT1G18990	71	23	0.093	0.755	155	6	0	0.037	PEG_LxC	NA
AT1G19000	112	86	0.0045	0.566	103	207	0.9757	0.668	Bial	NA
AT1G19010	40	3	0.0005	0.93	24	8	0	0.25	ColDom	4
AT1G19030	33	29	0.0368	0.532	25	26	0.0295	0.51	Bial	NA
AT1G19060	117	130	0	0.474	1	85	0	0.988	LerDom	4
AT1G19080	152	21	0	0.879	68	51	0	0.429	ColDom	5
AT1G19100	466	169	0.0007	0.734	158	399	0.0224	0.716	Bial	4
AT1G19110	38	53	0	0.418	25	49	0.9476	0.662	PEG_CxL	4
AT1G19150	81	50	0.2914	0.618	28	152	0	0.844	Bial	NA
AT1G19170	42	17	0.5174	0.712	2	38	0.0004	0.95	MEG_LxC	0
AT1G19180	18	6	0.4429	0.75	0	44	0	1	MEG_LxC	3
AT1G19220	107	22	0.0002	0.829	34	162	0	0.827	Bial	4
AT1G19230	31	21	0.334	0.596	6	26	0.1161	0.812	Bial	4
AT1G19240	102	30	0.0156	0.773	30	124	0.0006	0.805	Bial	4
AT1G19290	25	4	0.038	0.862	6	23	0.2007	0.793	Bial	3
AT1G19320	75	27	0.1804	0.735	207	150	0	0.42	PEG_LxC	6
AT1G19330	372	100	0	0.788	107	229	0.6316	0.682	Bial	4
AT1G19340	33	23	0.2684	0.589	2	59	0	0.967	MEG_LxC	0
AT1G19370	7	15	0.001	0.318	2	24	0.0104	0.923	PEG_CxL	5
AT1G19376	34	4	0.005	0.895	19	51	0.3399	0.729	MEG_CxL	NA
AT1G19380	51	86	0	0.372	64	52	0	0.448	PEG	3
AT1G19396	1768	177	0	0.909	385	444	0	0.536	MEG_CxL	1
AT1G19397	1837	200	0	0.902	412	494	0	0.545	MEG_CxL	NA
AT1G19430	1225	655	0.208	0.652	1591	3771	0	0.703	Bial	0
AT1G19450	41	12	0.1304	0.774	14	31	0.8009	0.689	Bial	4
AT1G19480	160	14	0	0.92	25	64	0.3637	0.719	MEG_CxL	3
AT1G19485	3581	547	0	0.867	3687	2010	0	0.353	ColDom	4
AT1G19490	453	234	0.73	0.659	202	398	0.8939	0.663	Bial	4
AT1G19500	213	148	0.0036	0.59	92	0	0	0	PEG_LxC	4
AT1G19570	425	135	0	0.759	82	187	0.3927	0.695	Bial	1
AT1G19600	588	313	0.4278	0.653	227	506	0.231	0.69	Bial	4
AT1G19640	105	9	0	0.921	26	377	0	0.935	MEG	6
AT1G19650	132	15	0	0.898	26	85	0.0433	0.766	MEG_CxL	4
AT1G19660	407	90	0	0.819	53	259	0	0.83	Bial	4
AT1G19680	482	140	0	0.775	131	398	0.0001	0.752	Bial	0
AT1G19690	1139	367	0	0.756	349	1152	0	0.767	Bial	4
AT1G19700	251	13	0	0.951	17	102	0	0.857	MEG	3
AT1G19710	313	148	0.6273	0.679	155	279	0.3622	0.643	Bial	3
AT1G19715	729	309	0.0229	0.702	281	564	0.9699	0.667	Bial	4
AT1G19720	126	21	0	0.857	57	43	0	0.43	ColDom	1
AT1G19740	41	2	0.0002	0.953	7	42	0.0089	0.857	MEG	1
AT1G19835	22	0	0.0017	1	20	16	0.0089	0.444	ColDom	12
AT1G19860	70	49	0.0946	0.588	80	144	0.523	0.643	Bial	4
AT1G19870	31	0	0.0002	1	0	23	0.0015	1	MEG	0
AT1G19880	627	232	0.0002	0.73	306	580	0.5206	0.655	Bial	8
AT1G19950	126	22	0	0.851	25	28	0.0518	0.528	MEG_CxL	0
AT1G19980	161	31	0	0.839	25	79	0.0684	0.76	Bial	NA
AT1G19990	1088	239	0	0.82	877	1735	0.8362	0.664	Bial	3
AT1G20020	2044	658	0	0.756	623	1082	0.0094	0.635	Bial	4
AT1G20030	12	20	0.0009	0.375	16	24	0.4433	0.6	PEG_CxL	3
AT1G20050	70	40	0.5548	0.636	34	72	0.8283	0.679	Bial	3
AT1G20060	460	304	0.0003	0.602	253	659	0.0008	0.723	Bial	4
AT1G20080	17	4	0.2071	0.81	9	20	0.8362	0.69	Bial	4
AT1G20100	16373	7857	0.0048	0.676	11894	30253	0	0.718	Bial	4
AT1G20110	120	92	0.0034	0.566	39	158	0.0002	0.802	Bial	4
AT1G20135	22	4	0.0727	0.846	10	18	0.833	0.643	Bial	NA
AT1G20140	599	250	0.025	0.706	544	542	0	0.499	PEG_LxC	4
AT1G20200	399	209	0.6366	0.656	154	441	0.0003	0.741	Bial	4
AT1G20220	2128	804	0	0.726	965	1805	0.133	0.652	Bial	0
AT1G20225	389	126	0	0.755	151	224	0.0084	0.597	Bial	4
AT1G20230	15	16	0.045	0.484	19	66	0.0505	0.776	Bial	4
AT1G20240	51	24	0.8364	0.68	48	126	0.1514	0.724	Bial	3
AT1G20260	348	88	0	0.798	173	281	0.0494	0.619	Bial	3
AT1G20270	277	114	0.1075	0.708	176	353	0.982	0.667	Bial	NA
AT1G20290	161	7	0	0.958	146	19	0	0.115	ColDom	NA
AT1G20360	135	69	0.9031	0.662	265	406	0.0016	0.605	Bial	3
AT1G20370	81	27	0.0903	0.75	38	62	0.3934	0.62	Bial	4
AT1G20380	273	210	0	0.565	88	451	0	0.837	Bial	4
AT1G20390	357	15	0	0.96	41	41	0.0029	0.5	ColDom	NA
AT1G20400	186	8	0	0.959	29	13	0	0.31	ColDom	NA
AT1G20430	52	22	0.5649	0.703	9	21	0.7548	0.7	Bial	5
AT1G20440	1217	0	0	1	11	653	0	0.983	MEG	0
AT1G20450	212	2	0	0.991	40	60	0.2111	0.6	MEG_CxL	4
AT1G20460	55	7	0.0005	0.887	31	38	0.064	0.551	MEG_CxL	5
AT1G20490	20	0	0.0029	1	0	26	0.0007	1	MEG	3
AT1G20510	33	44	0	0.429	2	46	0.0001	0.958	LerDom	3
AT1G20540	474	270	0.1163	0.637	142	557	0	0.797	Bial	4
AT1G20550	394	62	0	0.864	88	576	0	0.867	MEG	3
AT1G20560	121	29	0.0006	0.807	62	60	0.0001	0.492	PEG_LxC	4
AT1G20570	184	74	0.1474	0.713	46	212	0	0.822	Bial	0
AT1G20580	162	75	0.6325	0.684	86	165	0.8039	0.657	Bial	4
AT1G20610	190	106	0.4226	0.642	52	281	0	0.844	Bial	4
AT1G20620	1002	15	0	0.985	41	1318	0	0.97	MEG	3
AT1G20657	36	21	0.626	0.632	12	15	0.2834	0.556	Bial	NA
AT1G20670	355	81	0	0.814	282	332	0	0.541	Bial	4
AT1G20680	34	0	0.0001	1	0	137	0	1	MEG	3
AT1G20690	154	72	0.6861	0.681	108	260	0.1476	0.707	Bial	5
AT1G20691	147	68	0.646	0.684	101	256	0.067	0.717	Bial	NA
AT1G20693	519	130	0	0.8	163	445	0.0014	0.732	Bial	3
AT1G20696	1326	471	0	0.738	529	1662	0	0.759	Bial	1
AT1G20730	55	0	0	1	0	110	0	1	MEG	3
AT1G20735	130	12	0	0.915	52	45	0.0001	0.464	ColDom	4
AT1G20750	21	20	0.0517	0.512	26	21	0.0029	0.447	PEG_LxC	3
AT1G20795	90	4	0	0.957	3	79	0	0.963	MEG	0
AT1G20810	229	138	0.1112	0.624	124	308	0.0641	0.713	Bial	5
AT1G20816	25	6	0.1304	0.806	6	44	0.0029	0.88	MEG_LxC	4
AT1G20823	321	119	0.0086	0.73	157	213	0.0005	0.576	Bial	0
AT1G20870	84	73	0.0009	0.535	106	14	0	0.117	poPEG	0
AT1G20880	25	25	0.0194	0.5	11	20	0.8415	0.645	Bial	4
AT1G20890	25	10	0.6023	0.714	32	47	0.2331	0.595	Bial	3
AT1G20920	1660	778	0.1745	0.681	629	1610	0	0.719	Bial	4
AT1G20930	125	66	0.7608	0.654	48	90	0.7726	0.652	Bial	3
AT1G20940	122	53	0.449	0.697	132	222	0.1593	0.627	Bial	0
AT1G20950	26	11	0.6895	0.703	8	43	0.0137	0.843	Bial	4
AT1G20960	946	329	0	0.742	421	635	0	0.601	Bial	4
AT1G20970	730	182	0	0.8	500	1463	0	0.745	Bial	4
AT1G20980	73	26	0.1736	0.737	17	92	0.0002	0.844	Bial	4
AT1G21000	307	42	0	0.88	55	69	0.0165	0.556	MEG_CxL	3
AT1G21060	198	30	0	0.868	44	147	0.0051	0.77	poMEG	0
AT1G21065	216	29	0	0.882	51	136	0.1144	0.727	MEG_CxL	3
AT1G21080	162	40	0.0001	0.802	3	22	0.0387	0.88	Bial	3
AT1G21150	74	22	0.0444	0.771	21	44	0.8926	0.677	Bial	4
AT1G21160	21136	8526	0	0.713	23038	44155	0	0.657	Bial	4
AT1G21170	35	17	0.9359	0.673	18	40	0.7654	0.69	Bial	4
AT1G21190	681	143	0	0.826	235	416	0.1838	0.639	Bial	4
AT1G21200	50	33	0.2627	0.602	37	99	0.1776	0.728	Bial	4
AT1G21210	36	6	0.0142	0.857	14	8	0.0051	0.364	PEG_LxC	NA
AT1G21230	47	22	0.8295	0.681	4	17	0.2197	0.81	Bial	NA
AT1G21250	93	5	0	0.949	6	106	0	0.946	MEG	NA
AT1G21260	106	3	0	0.972	21	32	0.4033	0.604	MEG_CxL	NA
AT1G21310	20	0	0.0029	1	1	21	0.008	0.955	MEG	8
AT1G21350	63	10	0.0008	0.863	23	41	0.7198	0.641	MEG_CxL	4
AT1G21370	32	8	0.0998	0.8	15	20	0.2961	0.571	Bial	NA
AT1G21390	68	16	0.0091	0.81	6	16	0.6167	0.727	Bial	7
AT1G21400	104	19	0.0001	0.846	19	121	0	0.864	poMEG	4
AT1G21440	181	53	0.001	0.774	53	148	0.0569	0.736	Bial	4
AT1G21450	124	28	0.0002	0.816	36	108	0.0536	0.75	Bial	3
AT1G21460	60	0	0	1	0	21	0.0025	1	MEG	4
AT1G21480	134	34	0.0006	0.798	23	58	0.4181	0.716	Bial	3
AT1G21490	72	68	0.0003	0.514	103	181	0.3638	0.637	Bial	NA
AT1G21500	572	193	0	0.748	70	498	0	0.877	MEG_LxC	2
AT1G21580	1561	643	0.0001	0.708	776	1978	0	0.718	Bial	4
AT1G21590	115	20	0	0.852	32	36	0.0277	0.529	MEG_CxL	0
AT1G21600	440	136	0	0.764	141	319	0.2856	0.693	Bial	0
AT1G21630	217	114	0.7144	0.656	23	110	0.0002	0.827	Bial	4
AT1G21680	315	101	0.0002	0.757	52	342	0	0.868	poMEG	3
AT1G21690	423	55	0	0.885	189	80	0	0.297	ColDom	3
AT1G21720	44	9	0.0182	0.83	29	104	0.0091	0.782	Bial	0
AT1G21730	232	33	0	0.875	45	93	0.8889	0.674	MEG_CxL	3
AT1G21840	166	61	0.0558	0.731	45	148	0.0062	0.767	Bial	3
AT1G21900	117	90	0.0035	0.565	47	114	0.3334	0.708	Bial	1
AT1G21920	175	56	0.0058	0.758	145	99	0	0.406	PEG_LxC	0
AT1G21930	122	40	0.0298	0.753	53	142	0.1006	0.728	Bial	1
AT1G21970	435	83	0	0.84	118	237	0.9776	0.668	Bial	0
AT1G21980	29	3	0.0069	0.906	3	36	0.0015	0.923	MEG	3
AT1G22015	407	110	0	0.787	152	259	0.1619	0.63	Bial	3
AT1G22020	78	33	0.477	0.703	54	72	0.0382	0.571	Bial	0
AT1G22030	20	0	0.0029	1	1	19	0.0132	0.95	MEG_CxL	0
AT1G22040	143	29	0	0.831	65	151	0.3834	0.699	Bial	0
AT1G22050	9	16	0.0021	0.36	36	9	0	0.2	PEG	NA
AT1G22070	69	62	0.0013	0.527	11	130	0	0.922	MEG_LxC	4
AT1G22080	377	252	0.0007	0.599	143	210	0.0081	0.595	Bial	NA
AT1G22090	253	186	0.0001	0.576	205	352	0.1189	0.632	Bial	4
AT1G22100	15	19	0.0089	0.441	12	26	0.8579	0.684	PEG_CxL	NA
AT1G22110	828	372	0.1155	0.69	306	608	0.9409	0.665	Bial	0
AT1G22120	245	71	0.0001	0.775	78	337	0	0.812	Bial	7
AT1G22160	60	8	0.0003	0.882	22	86	0.0082	0.796	poMEG	3
AT1G22170	84	75	0.0005	0.528	64	52	0	0.448	poPEG	3
AT1G22180	73	33	0.6794	0.689	28	45	0.4343	0.616	Bial	4
AT1G22190	50	4	0.0001	0.926	39	73	0.7901	0.652	MEG_CxL	4
AT1G22200	1167	458	0	0.718	643	763	0	0.543	Bial	0
AT1G22210	64	26	0.428	0.711	22	79	0.0238	0.782	Bial	NA
AT1G22250	136	0	0	1	8	34	0.0755	0.81	MEG_CxL	1
AT1G22260	44	14	0.1757	0.759	23	33	0.2825	0.589	Bial	4
AT1G22270	145	38	0.0006	0.792	152	232	0.0167	0.604	Bial	0
AT1G22300	927	277	0	0.77	361	742	0.7302	0.673	Bial	3
AT1G22310	213	90	0.2247	0.703	116	257	0.4319	0.689	Bial	0
AT1G22403	447	292	0.0007	0.605	230	222	0	0.491	PEG_LxC	NA
AT1G22520	212	133	0.0569	0.614	68	228	0.0004	0.77	Bial	4
AT1G22530	262	1	0	0.996	14	64	0.0076	0.821	poMEG	4
AT1G22540	20	24	0.005	0.455	11	42	0.0789	0.792	PEG_CxL	4
AT1G22610	61	0	0	1	0	51	0	1	MEG	5
AT1G22620	424	135	0	0.758	123	322	0.0191	0.724	Bial	0
AT1G22630	200	13	0	0.939	34	49	0.1907	0.59	MEG_CxL	3
AT1G22650	43	0	0	1	21	5	0	0.192	ColDom	4
AT1G22660	44	14	0.1757	0.759	6	44	0.0029	0.88	MEG_LxC	0
AT1G22680	41	13	0.1889	0.759	26	25	0.0137	0.49	Bial	NA
AT1G22750	319	58	0	0.846	33	123	0.0026	0.788	Bial	4
AT1G22760	83	16	0.0006	0.838	11	23	0.9252	0.676	Bial	4
AT1G22770	135	74	0.5786	0.646	62	225	0.0001	0.784	Bial	NA
AT1G22780	123	65	0.7589	0.654	24	84	0.0245	0.778	Bial	NA
AT1G22790	82	39	0.8285	0.678	32	147	0	0.821	Bial	4
AT1G22800	434	79	0	0.846	177	147	0	0.454	PEG_LxC	4
AT1G22810	41	14	0.2637	0.745	15	32	0.8719	0.681	Bial	NA
AT1G22850	393	70	0	0.849	95	195	0.8711	0.672	Bial	1
AT1G22860	106	24	0.0007	0.815	26	43	0.517	0.623	Bial	4
AT1G22882	33	19	0.6726	0.635	30	25	0.0019	0.455	PEG_LxC	3
AT1G22910	338	0	0	1	2	585	0	0.997	MEG	0
AT1G22920	60	42	0.1233	0.588	8	45	0.0092	0.849	Bial	0
AT1G22960	38	0	0	1	5	16	0.4265	0.762	MEG_CxL	4
AT1G22970	208	64	0.0012	0.765	114	283	0.0774	0.713	Bial	0
AT1G22985	24	4	0.0472	0.857	16	24	0.4433	0.6	Bial	0
AT1G23020	58	8	0.0005	0.879	14	32	0.7363	0.696	MEG_CxL	4
AT1G23030	69	3	0	0.958	11	28	0.5692	0.718	MEG_CxL	4
AT1G23040	67	6	0	0.918	3	36	0.0015	0.923	MEG	4
AT1G23050	28	7	0.125	0.8	6	70	0	0.921	MEG_LxC	0
AT1G23052	28	7	0.125	0.8	6	70	0	0.921	MEG_LxC	NA
AT1G23060	246	27	0	0.901	7	212	0	0.968	MEG	4
AT1G23080	18	2	0.0396	0.9	0	36	0.0001	1	MEG_LxC	4
AT1G23090	20	0	0.0029	1	7	76	0	0.916	MEG	NA
AT1G23100	39	17	0.6846	0.696	22	78	0.0275	0.78	Bial	1
AT1G23110	12	14	0.0392	0.462	12	22	0.8494	0.647	Bial	NA
AT1G23147	73	91	0	0.445	297	797	0	0.729	PEG_CxL	3
AT1G23170	107	140	0	0.433	50	131	0.1458	0.724	PEG_CxL	3
AT1G23180	182	134	0.0012	0.576	117	281	0.1364	0.706	Bial	4
AT1G23190	444	171	0.0063	0.722	232	505	0.3545	0.685	Bial	4
AT1G23200	130	1	0	0.992	45	21	0	0.318	ColDom	8
AT1G23205	93	13	0	0.877	10	10	0.1585	0.5	MEG_CxL	0
AT1G23230	302	104	0.0018	0.744	137	296	0.5276	0.684	Bial	4
AT1G23280	175	88	0.9724	0.665	114	245	0.5977	0.682	Bial	0
AT1G23290	673	458	0	0.595	297	603	0.8683	0.67	Bial	3
AT1G23320	5	180	0	0.027	78	87	0.0004	0.527	poPEG	NA
AT1G23330	204	142	0.0042	0.59	240	443	0.3882	0.649	Bial	4
AT1G23350	113	29	0.0021	0.796	45	0	0	0	PEG_LxC	NA
AT1G23360	43	10	0.0378	0.811	34	44	0.0825	0.564	Bial	4
AT1G23380	46	20	0.6506	0.697	0	69	0	1	MEG_LxC	1
AT1G23390	284	31	0	0.902	16	402	0	0.962	MEG	4
AT1G23420	146	0	0	1	0	52	0	1	MEG	NA
AT1G23440	448	56	0	0.889	122	114	0	0.483	ColDom	4
AT1G23460	127	10	0	0.927	30	37	0.0719	0.552	MEG_CxL	3
AT1G23470	365	64	0	0.851	116	244	0.7161	0.678	MEG_CxL	NA
AT1G23490	335	131	0.0257	0.719	80	200	0.1302	0.714	Bial	1
AT1G23540	98	9	0	0.916	8	39	0.0297	0.83	MEG_CxL	4
AT1G23550	67	15	0.0066	0.817	42	45	0.0061	0.517	Bial	4
AT1G23560	40	17	0.626	0.702	30	41	0.1549	0.577	Bial	4
AT1G23670	33	9	0.1339	0.786	7	20	0.4876	0.741	Bial	2
AT1G23710	184	50	0.0002	0.786	78	163	0.8	0.676	Bial	3
AT1G23740	140	87	0.1445	0.617	72	181	0.1418	0.715	Bial	1
AT1G23870	245	76	0.0005	0.763	100	191	0.7641	0.656	Bial	3
AT1G23880	95	14	0	0.872	7	44	0.0059	0.863	MEG	3
AT1G23890	193	13	0	0.937	154	64	0	0.294	ColDom	3
AT1G23900	75	17	0.0044	0.815	15	28	0.8661	0.651	Bial	4
AT1G23980	24	0	0.001	1	8	26	0.2886	0.765	MEG_CxL	NA
AT1G24010	61	2	0	0.968	0	38	0	1	MEG	7
AT1G24020	276	4	0	0.986	15	101	0	0.871	MEG	3
AT1G24030	154	17	0	0.901	31	20	0.0001	0.392	ColDom	5
AT1G24040	209	11	0	0.95	70	21	0	0.231	ColDom	4
AT1G24050	632	126	0	0.834	122	334	0.0057	0.732	Bial	4
AT1G24060	146	0	0	1	23	3	0	0.115	ColDom	4
AT1G24062	305	90	0	0.772	274	244	0	0.471	PEG_LxC	6
AT1G24095	9	19	0.0002	0.321	12	24	1	0.667	PEG_CxL	4
AT1G24100	93	27	0.0186	0.775	67	199	0.0092	0.748	Bial	0
AT1G24130	10	47	0	0.175	41	37	0.0007	0.474	PEG	10
AT1G24150	56	50	0.0044	0.528	88	230	0.0513	0.723	Bial	4
AT1G24160	36	57	0	0.387	40	235	0	0.855	LerDom	1
AT1G24170	39	1	0.0001	0.975	1	122	0	0.992	MEG	0
AT1G24190	107	18	0	0.856	49	47	0.0006	0.49	ColDom	4
AT1G24212	237	138	0.1954	0.632	291	443	0.0007	0.604	Bial	NA
AT1G24220	24	3	0.0221	0.889	0	22	0.002	1	MEG_LxC	NA
AT1G24240	313	7	0	0.978	60	5	0	0.077	ColDom	4
AT1G24260	448	3	0	0.993	1	107	0	0.991	MEG	3
AT1G24267	892	391	0.0437	0.695	467	890	0.4712	0.656	Bial	5
AT1G24300	576	171	0	0.771	274	702	0.0011	0.719	Bial	4
AT1G24310	137	38	0.0021	0.783	26	62	0.5238	0.705	Bial	NA
AT1G24330	49	9	0.0068	0.845	11	45	0.0477	0.804	Bial	3
AT1G24340	449	123	0	0.785	288	277	0	0.49	PEG_LxC	4
AT1G24350	609	82	0	0.881	419	328	0	0.439	ColDom	4
AT1G24360	4002	679	0	0.855	2124	1968	0	0.481	ColDom	4
AT1G24370	11	549	0	0.02	0	1121	0	1	LerDom	NA
AT1G24388	20	18	0.0907	0.526	0	71	0	1	MEG_LxC	12
AT1G24390	20	10	1	0.667	0	25	0.0009	1	MEG_LxC	NA
AT1G24400	138	56	0.2326	0.711	46	104	0.5606	0.693	Bial	2
AT1G24420	12	8	0.5803	0.6	25	33	0.1593	0.569	Bial	NA
AT1G24440	64	24	0.2776	0.727	14	33	0.6714	0.702	Bial	1
AT1G24450	263	22	0	0.923	63	234	0	0.788	poMEG	4
AT1G24460	45	15	0.2141	0.75	37	35	0.0025	0.486	PEG_LxC	4
AT1G24490	68	102	0	0.4	43	102	0.4199	0.703	PEG_CxL	4
AT1G24510	471	145	0	0.765	146	312	0.5813	0.681	Bial	0
AT1G24520	435	146	0.0001	0.749	274	0	0	0	PEG_LxC	5
AT1G24530	34	7	0.04	0.829	6	41	0.0055	0.872	MEG_LxC	6
AT1G24560	532	304	0.0865	0.636	395	1029	0	0.723	Bial	4
AT1G24570	132	20	0	0.868	33	76	0.5706	0.697	MEG_CxL	NA
AT1G24620	18	13	0.3646	0.581	24	3	0	0.111	PEG_LxC	NA
AT1G25330	24	1	0.0034	0.96	12	110	0	0.902	MEG	NA
AT1G25400	40	11	0.1011	0.784	10	30	0.3317	0.75	Bial	1
AT1G25420	271	77	0	0.779	64	126	0.9359	0.663	Bial	1
AT1G25440	137	41	0.0061	0.77	19	134	0	0.876	poMEG	1
AT1G25450	92	24	0.0066	0.793	4	42	0.0009	0.913	poMEG	1
AT1G25470	12	13	0.0671	0.48	4	49	0.0002	0.925	MEG_LxC	NA
AT1G25472	12	13	0.0671	0.48	4	49	0.0002	0.925	MEG_LxC	NA
AT1G25480	75	33	0.5931	0.694	13	94	0	0.879	MEG_LxC	0
AT1G25500	647	194	0	0.769	315	488	0.0009	0.608	Bial	4
AT1G25510	67	6	0	0.918	4	36	0.0036	0.9	MEG	4
AT1G25570	285	26	0	0.916	76	83	0.0003	0.522	MEG_CxL	6
AT1G25580	21	47	0	0.309	23	91	0.0057	0.798	PEG_CxL	4
AT1G25682	42	16	0.4097	0.724	14	27	0.931	0.659	Bial	3
AT1G26110	3856	1826	0.0771	0.679	1866	4300	0	0.697	Bial	1
AT1G26130	643	144	0	0.817	267	388	0.0001	0.592	Bial	0
AT1G26150	462	122	0	0.791	72	384	0	0.842	Bial	4
AT1G26300	38	29	0.1126	0.567	25	23	0.0109	0.479	Bial	NA
AT1G26330	73	34	0.7718	0.682	42	129	0.0256	0.754	Bial	3
AT1G26340	28	16	0.715	0.636	12	27	0.7861	0.692	Bial	3
AT1G26520	106	84	0.0027	0.558	111	161	0.016	0.592	Bial	4
AT1G26560	99	2	0	0.98	1	33	0.0004	0.971	MEG	0
AT1G26580	79	15	0.0007	0.84	4	19	0.1476	0.826	Bial	4
AT1G26660	187	43	0	0.813	57	149	0.122	0.723	Bial	NA
AT1G26740	20	8	0.6433	0.714	14	17	0.2172	0.548	Bial	4
AT1G26770	99	2	0	0.98	2	124	0	0.984	MEG	6
AT1G26880	148	164	0	0.474	95	136	0.0209	0.589	PEG_CxL	NA
AT1G26890	47	21	0.7135	0.691	41	35	0.0004	0.461	PEG_LxC	4
AT1G26900	73	64	0.0017	0.533	65	94	0.0673	0.591	Bial	0
AT1G26920	18	6	0.4429	0.75	8	51	0.0027	0.864	MEG_LxC	4
AT1G26930	219	2	0	0.991	0	287	0	1	MEG	6
AT1G26940	86	143	0	0.376	50	198	0	0.798	PEG_CxL	4
AT1G27000	182	67	0.0458	0.731	51	192	0.0001	0.79	Bial	4
AT1G27030	11	12	0.0766	0.478	3	17	0.1186	0.85	Bial	NA
AT1G27040	79	36	0.6918	0.687	6	105	0	0.946	MEG_LxC	3
AT1G27050	56	38	0.1841	0.596	41	135	0.009	0.767	Bial	4
AT1G27070	29	12	0.6319	0.707	16	49	0.1854	0.754	Bial	4
AT1G27080	254	10	0	0.962	21	127	0	0.858	MEG	3
AT1G27090	68	11	0.0005	0.861	20	15	0.0056	0.429	ColDom	4
AT1G27110	131	20	0	0.868	84	11	0	0.116	ColDom	1
AT1G27120	1003	301	0	0.769	487	362	0	0.426	PEG_LxC	4
AT1G27130	252	1	0	0.996	7	27	0.1598	0.794	MEG_CxL	5
AT1G27150	232	61	0	0.792	155	123	0	0.442	PEG_LxC	3
AT1G27190	165	17	0	0.907	45	73	0.3361	0.619	MEG_CxL	4
AT1G27285	171	1	0	0.994	105	0	0	0	ColDom	NA
AT1G27290	231	60	0	0.794	15	337	0	0.957	poMEG	3
AT1G27310	102	14	0	0.879	10	48	0.0167	0.828	MEG_CxL	NA
AT1G27340	77	114	0	0.403	62	284	0	0.821	PEG_CxL	3
AT1G27380	197	8	0	0.961	0	107	0	1	MEG	NA
AT1G27385	80	21	0.0122	0.792	16	97	0	0.858	MEG_LxC	4
AT1G27400	1830	831	0.032	0.688	693	1613	0.0018	0.699	Bial	3
AT1G27410	113	54	0.8175	0.677	46	142	0.0176	0.755	Bial	0
AT1G27420	168	59	0.0288	0.74	37	76	0.9184	0.673	Bial	0
AT1G27430	1035	327	0	0.76	575	1392	0.0003	0.708	Bial	4
AT1G27435	15	11	0.3874	0.577	4	43	0.0007	0.915	MEG_LxC	1
AT1G27460	177	3	0	0.983	19	39	0.9412	0.672	MEG_CxL	3
AT1G27470	32	29	0.0282	0.525	23	67	0.163	0.744	Bial	4
AT1G27520	2630	280	0	0.904	1107	735	0	0.399	ColDom	6
AT1G27530	177	52	0.0013	0.773	77	152	0.9409	0.664	Bial	4
AT1G27540	63	82	0	0.434	1	196	0	0.995	LerDom	0
AT1G27590	166	55	0.0126	0.751	72	160	0.5307	0.69	Bial	0
AT1G27595	597	220	0.0002	0.731	243	482	0.9348	0.665	Bial	4
AT1G27600	43	14	0.2018	0.754	33	25	0.0004	0.431	PEG_LxC	3
AT1G27630	224	111	0.95	0.669	113	236	0.7606	0.676	Bial	4
AT1G27650	412	172	0.0657	0.705	231	405	0.1539	0.637	Bial	NA
AT1G27680	1051	569	0.163	0.649	788	1191	0	0.602	Bial	3
AT1G27695	349	157	0.3245	0.69	143	373	0.0124	0.723	Bial	3
AT1G27710	98	36	0.1465	0.731	32	92	0.11	0.742	Bial	4
AT1G27720	400	187	0.5043	0.681	218	298	0.0001	0.578	Bial	4
AT1G27750	46	17	0.3385	0.73	15	5	0.0002	0.25	PEG_LxC	4
AT1G27752	206	117	0.3238	0.638	61	600	0	0.908	MEG_LxC	3
AT1G27760	37	10	0.1073	0.787	13	43	0.1517	0.768	Bial	1
AT1G27840	254	23	0	0.917	108	158	0.0208	0.594	MEG_CxL	4
AT1G27850	120	16	0	0.882	40	108	0.1463	0.73	MEG_CxL	4
AT1G27860	1470	268	0	0.846	557	354	0	0.389	PEG_LxC	4
AT1G27880	161	55	0.0219	0.745	51	160	0.009	0.758	Bial	10
AT1G27900	63	17	0.0328	0.788	26	74	0.1658	0.74	Bial	3
AT1G27920	27	22	0.1149	0.551	7	40	0.0134	0.851	Bial	NA
AT1G27970	268	70	0	0.793	96	271	0.0069	0.738	Bial	0
AT1G28050	68	15	0.0055	0.819	8	72	0	0.9	poMEG	4
AT1G28060	1418	982	0	0.591	1213	6170	0	0.836	Bial	3
AT1G28070	120	12	0	0.909	80	21	0	0.208	ColDom	9
AT1G28100	138	34	0.0003	0.802	23	82	0.0225	0.781	Bial	3
AT1G28110	149	23	0	0.866	29	78	0.2277	0.729	MEG_CxL	4
AT1G28120	480	236	0.8593	0.67	234	429	0.3533	0.647	Bial	3
AT1G28140	315	119	0.0144	0.726	132	190	0.0069	0.59	Bial	3
AT1G28150	177	29	0	0.859	40	102	0.2509	0.718	MEG_CxL	3
AT1G28160	20	2	0.0244	0.909	10	11	0.2197	0.524	Bial	NA
AT1G28200	267	153	0.2229	0.636	138	285	0.8059	0.674	Bial	4
AT1G28270	648	142	0	0.82	280	11	0	0.038	PEG_LxC	0
AT1G28280	31	0	0.0002	1	1	36	0.0002	0.973	MEG	NA
AT1G28300	96	33	0.085	0.744	22	27	0.1237	0.551	Bial	7
AT1G28320	362	211	0.1032	0.632	144	523	0	0.784	Bial	4
AT1G28323	17	25	0.0006	0.405	4	25	0.0415	0.862	PEG_CxL	NA
AT1G28327	54	10	0.0047	0.844	0	28	0.0005	1	poMEG	NA
AT1G28330	528	140	0	0.79	61	371	0	0.859	poMEG	NA
AT1G28340	210	36	0	0.854	56	132	0.3728	0.702	MEG_CxL	1
AT1G28350	570	176	0	0.764	235	496	0.569	0.679	Bial	4
AT1G28370	96	52	0.6895	0.649	79	118	0.0677	0.599	Bial	1
AT1G28380	35	45	0	0.438	0	22	0.002	1	LerDom	4
AT1G28390	67	19	0.0398	0.779	8	33	0.0903	0.805	Bial	1
AT1G28395	42	23	0.7654	0.646	19	37	0.9405	0.661	Bial	NA
AT1G28410	161	17	0	0.904	60	144	0.2993	0.706	MEG_CxL	3
AT1G28420	6664	3926	0	0.629	6613	17916	0	0.73	Bial	4
AT1G28440	60	41	0.1574	0.594	8	47	0.0061	0.855	MEG_LxC	12
AT1G28490	1295	621	0.4485	0.676	532	1181	0.0701	0.689	Bial	8
AT1G28500	128	47	0.0941	0.731	52	129	0.2478	0.713	Bial	5
AT1G28510	55	11	0.0069	0.833	29	67	0.5878	0.698	Bial	3
AT1G28520	261	218	0	0.545	144	214	0.0106	0.598	Bial	4
AT1G28530	60	46	0.0411	0.566	15	37	0.5647	0.712	Bial	NA
AT1G28540	89	52	0.4286	0.631	88	222	0.096	0.716	Bial	3
AT1G28560	70	67	0.0002	0.511	33	132	0.0007	0.8	Bial	4
AT1G28580	118	5	0	0.959	27	107	0.0026	0.799	poMEG	6
AT1G28590	30	16	0.8611	0.652	4	28	0.0216	0.875	Bial	12
AT1G28610	23	13	0.7633	0.639	0	52	0	1	MEG_LxC	NA
AT1G28630	118	82	0.0323	0.59	214	29	0	0.119	PEG_LxC	8
AT1G28710	232	143	0.0683	0.619	125	218	0.2848	0.636	Bial	2
AT1G28860	20	3	0.0558	0.87	9	12	0.4265	0.571	Bial	NA
AT1G28960	176	74	0.2584	0.704	91	206	0.3963	0.694	Bial	10
AT1G29010	105	36	0.0692	0.745	39	49	0.0463	0.557	Bial	NA
AT1G29040	334	193	0.1429	0.634	338	837	0.002	0.712	Bial	NA
AT1G29041	334	193	0.1429	0.634	338	837	0.002	0.712	Bial	NA
AT1G29050	452	0	0	1	28	397	0	0.934	MEG	0
AT1G29060	102	41	0.2877	0.713	85	198	0.3044	0.7	Bial	4
AT1G29070	934	421	0.1043	0.689	399	914	0.0386	0.696	Bial	3
AT1G29080	72	84	0	0.462	41	134	0.0102	0.766	PEG_CxL	4
AT1G29220	786	704	0	0.528	1591	4204	0	0.725	Bial	4
AT1G29340	407	134	0.0001	0.752	282	386	0	0.578	Bial	5
AT1G29355	33	7	0.0487	0.825	28	16	0.0001	0.364	PEG_LxC	NA
AT1G29357	84	16	0.0005	0.84	36	58	0.3778	0.617	Bial	NA
AT1G29410	197	90	0.5345	0.686	50	165	0.0035	0.767	Bial	3
AT1G29418	5264	1568	0	0.77	1995	3436	0	0.633	Bial	3
AT1G29420	2540	561	0	0.819	1050	1385	0	0.569	Bial	NA
AT1G29465	71	19	0.0216	0.789	4	29	0.0173	0.879	Bial	NA
AT1G29500	27	0	0.0005	1	0	32	0.0002	1	MEG	NA
AT1G29530	72	662	0	0.098	103	2170	0	0.955	LerDom	0
AT1G29540	35	24	0.2816	0.593	16	16	0.0699	0.5	Bial	3
AT1G29560	1448	755	0.4067	0.657	1025	2715	0	0.726	Bial	1
AT1G29600	3449	11	0	0.997	1564	110	0	0.066	ColDom	NA
AT1G29630	187	62	0.008	0.751	46	166	0.0008	0.783	Bial	4
AT1G29650	76	14	0.0007	0.844	12	27	0.7861	0.692	Bial	NA
AT1G29660	73	4	0	0.948	2	80	0	0.976	MEG	9
AT1G29670	319	20	0	0.941	6	145	0	0.96	MEG	NA
AT1G29680	121	7	0	0.945	0	63	0	1	MEG	NA
AT1G29730	85	9	0	0.904	25	30	0.085	0.545	MEG_CxL	3
AT1G29750	149	13	0	0.92	18	131	0	0.879	MEG	4
AT1G29760	113	89	0.0023	0.559	63	143	0.4753	0.694	Bial	3
AT1G29770	128	5	0	0.962	3	21	0.0486	0.875	MEG_CxL	4
AT1G29785	24	0	0.001	1	13	16	0.248	0.552	MEG_CxL	NA
AT1G29790	59	9	0.0009	0.868	36	15	0	0.294	ColDom	5
AT1G29800	155	32	0	0.829	55	52	0.0002	0.486	PEG_LxC	3
AT1G29810	275	51	0	0.844	88	132	0.0565	0.6	Bial	3
AT1G29820	48	8	0.0044	0.857	0	42	0	1	MEG	4
AT1G29850	643	197	0	0.765	281	963	0	0.774	Bial	4
AT1G29880	125	52	0.3173	0.706	99	158	0.113	0.615	Bial	4
AT1G29890	101	50	0.9626	0.669	18	91	0.0005	0.835	Bial	4
AT1G29900	254	32	0	0.888	70	135	0.8462	0.659	MEG_CxL	4
AT1G29910	75	24	0.0763	0.758	5	100	0	0.952	MEG_LxC	6
AT1G29920	6512	1320	0	0.831	870	3899	0	0.818	Bial	6
AT1G29950	54	5	0.0001	0.915	6	36	0.0159	0.857	MEG_CxL	4
AT1G29951	47	3	0.0001	0.94	6	36	0.0159	0.857	MEG_CxL	NA
AT1G29952	47	3	0.0001	0.94	6	36	0.0159	0.857	MEG_CxL	NA
AT1G29962	8	12	0.018	0.4	7	18	0.6395	0.72	Bial	NA
AT1G29965	592	346	0.0316	0.631	181	632	0	0.777	Bial	0
AT1G29970	635	364	0.0538	0.636	214	702	0	0.766	Bial	1
AT1G29990	164	122	0.0016	0.573	60	121	0.9674	0.669	Bial	4
AT1G30000	59	8	0.0004	0.881	4	54	0.0001	0.931	MEG	4
AT1G30010	60	17	0.052	0.779	16	47	0.2393	0.746	Bial	4
AT1G30020	18	10	0.8213	0.643	5	17	0.3606	0.773	Bial	NA
AT1G30070	150	43	0.0021	0.777	68	94	0.0327	0.58	Bial	3
AT1G30090	54	40	0.08	0.574	62	81	0.0194	0.566	Bial	3
AT1G30100	33	3	0.0027	0.917	3	30	0.0062	0.909	MEG	NA
AT1G30110	134	120	0	0.528	60	116	0.8675	0.659	Bial	3
AT1G30120	515	183	0.0002	0.738	264	417	0.0053	0.612	Bial	4
AT1G30130	12	12	0.1116	0.5	2	29	0.0031	0.935	MEG_LxC	4
AT1G30180	31	41	0.0001	0.431	10	28	0.4305	0.737	PEG_CxL	NA
AT1G30200	538	62	0	0.897	164	120	0	0.423	ColDom	1
AT1G30230	376	138	0.0033	0.732	128	376	0.0004	0.746	Bial	5
AT1G30240	36	14	0.48	0.72	13	36	0.3834	0.735	Bial	4
AT1G30320	95	71	0.0158	0.572	27	58	0.8076	0.682	Bial	4
AT1G30340	44	6	0.0025	0.88	30	4	0	0.118	ColDom	NA
AT1G30380	27	8	0.2344	0.771	7	16	0.815	0.696	Bial	NA
AT1G30410	94	39	0.3823	0.707	54	52	0.0003	0.491	PEG_LxC	4
AT1G30420	98	17	0.0001	0.852	42	81	0.882	0.659	MEG_CxL	4
AT1G30440	127	10	0	0.927	121	189	0.0528	0.61	MEG_CxL	NA
AT1G30470	106	63	0.3299	0.627	65	165	0.1451	0.717	Bial	0
AT1G30490	1317	101	0	0.929	10	689	0	0.986	MEG	3
AT1G30500	382	36	0	0.914	50	101	0.9643	0.669	MEG_CxL	3
AT1G30510	665	247	0.0001	0.729	268	623	0.0615	0.699	Bial	6
AT1G30520	40	7	0.012	0.851	5	69	0	0.932	MEG_LxC	3
AT1G30530	870	2	0	0.998	0	489	0	1	MEG	3
AT1G30540	63	31	0.9525	0.67	30	50	0.5029	0.625	Bial	4
AT1G30550	95	73	0.009	0.565	12	140	0	0.921	MEG_LxC	3
AT1G30590	59	5	0	0.922	11	14	0.3253	0.56	MEG_CxL	4
AT1G30610	43	8	0.0122	0.843	21	17	0.008	0.447	PEG_LxC	3
AT1G30620	30	2	0.0021	0.938	9	16	0.823	0.64	MEG_CxL	0
AT1G30690	220	15	0	0.936	145	216	0.011	0.598	MEG_CxL	4
AT1G30710	87	31	0.1362	0.737	249	96	0	0.278	PEG_LxC	3
AT1G30740	102	29	0.0108	0.779	25	55	0.7503	0.688	Bial	4
AT1G30755	139	68	0.9035	0.671	57	84	0.1082	0.596	Bial	4
AT1G30800	59	19	0.1231	0.756	19	16	0.0154	0.457	Bial	NA
AT1G30810	187	53	0.0005	0.779	90	57	0	0.388	PEG_LxC	0
AT1G30825	115	41	0.0849	0.737	40	75	0.7928	0.652	Bial	0
AT1G30835	1155	8	0	0.993	682	31	0	0.043	ColDom	NA
AT1G30840	273	106	0.0395	0.72	142	370	0.0132	0.723	Bial	1
AT1G30845	110	15	0	0.88	74	75	0.0001	0.503	MEG_CxL	1
AT1G30860	1000	626	0	0.615	877	2596	0	0.747	Bial	4
AT1G30880	241	105	0.2893	0.697	126	355	0.002	0.738	Bial	3
AT1G30890	347	152	0.2172	0.695	143	202	0.0029	0.586	Bial	4
AT1G30910	193	117	0.1314	0.623	56	153	0.0692	0.732	Bial	4
AT1G30920	33	12	0.3989	0.733	15	51	0.0996	0.773	Bial	6
AT1G30921	49	73	0	0.402	10	103	0	0.912	LerDom	NA
AT1G30940	73	4	0	0.948	19	4	0	0.174	ColDom	NA
AT1G30960	110	103	0	0.516	78	143	0.6075	0.647	Bial	0
AT1G30970	616	228	0.0002	0.73	318	466	0.0001	0.594	Bial	4
AT1G30972	146	1	0	0.993	29	26	0.0046	0.473	ColDom	NA
AT1G30974	27	8	0.2344	0.771	48	20	0	0.294	PEG_LxC	NA
AT1G31070	808	136	0	0.856	322	51	0	0.137	ColDom	4
AT1G31090	61	30	0.9518	0.67	40	96	0.4037	0.706	Bial	8
AT1G31100	37	22	0.573	0.627	11	33	0.3062	0.75	Bial	NA
AT1G31120	206	108	0.7335	0.656	101	59	0	0.369	PEG_LxC	6
AT1G31175	196	110	0.3877	0.641	62	208	0.0007	0.77	Bial	4
AT1G31190	860	206	0	0.807	259	465	0.2189	0.642	Bial	NA
AT1G31200	21	6	0.2696	0.778	14	8	0.0051	0.364	PEG_LxC	NA
AT1G31220	262	64	0	0.804	150	236	0.0351	0.611	Bial	3
AT1G31230	91	35	0.2316	0.722	16	126	0	0.887	MEG_LxC	4
AT1G31240	34	57	0	0.374	34	67	0.9551	0.663	PEG_CxL	3
AT1G31250	2321	209	0	0.917	837	137	0	0.141	ColDom	0
AT1G31280	91	106	0	0.462	21	137	0	0.867	LerDom	4
AT1G31290	63	13	0.0047	0.829	2	113	0	0.983	poMEG	4
AT1G31300	458	157	0.0001	0.745	320	604	0.4753	0.654	Bial	4
AT1G31320	53	70	0	0.431	16	42	0.4256	0.724	PEG_CxL	0
AT1G31330	2803	769	0	0.785	576	2475	0	0.811	Bial	1
AT1G31340	222	114	0.8452	0.661	90	143	0.1244	0.614	Bial	4
AT1G31350	161	27	0	0.856	58	164	0.0373	0.739	MEG_CxL	4
AT1G31355	65	71	0	0.478	31	266	0	0.896	LerDom	NA
AT1G31360	113	12	0	0.904	11	18	0.6653	0.621	MEG_CxL	4
AT1G31410	117	49	0.3512	0.705	14	195	0	0.933	MEG_LxC	4
AT1G31420	923	151	0	0.859	318	307	0	0.491	ColDom	1
AT1G31440	116	3	0	0.975	49	22	0	0.31	ColDom	6
AT1G31460	289	26	0	0.917	78	175	0.4712	0.692	MEG_CxL	3
AT1G31470	143	8	0	0.947	21	87	0.0045	0.806	poMEG	4
AT1G31480	276	32	0	0.896	119	256	0.5834	0.683	MEG_CxL	4
AT1G31485	56	16	0.0642	0.778	28	64	0.6243	0.696	Bial	NA
AT1G31490	374	59	0	0.864	170	370	0.433	0.685	MEG_CxL	NA
AT1G31500	198	168	0	0.541	49	290	0	0.855	MEG_LxC	5
AT1G31530	120	97	0.0008	0.553	286	594	0.6659	0.675	Bial	0
AT1G31540	184	0	0	1	14	22	0.5516	0.611	MEG_CxL	5
AT1G31550	155	0	0	1	0	94	0	1	MEG	8
AT1G31600	1021	13	0	0.987	627	36	0	0.054	ColDom	11
AT1G31640	2	41	0	0.047	29	12	0	0.293	PEG	12
AT1G31650	221	9	0	0.961	26	54	0.9039	0.675	MEG_CxL	12
AT1G31660	1233	475	0	0.722	460	820	0.0735	0.641	Bial	4
AT1G31710	177	0	0	1	105	6	0	0.054	ColDom	9
AT1G31730	202	81	0.1231	0.714	67	251	0	0.789	Bial	4
AT1G31780	348	154	0.2543	0.693	168	396	0.1082	0.702	Bial	3
AT1G31800	25	14	0.7731	0.641	5	21	0.1746	0.808	Bial	3
AT1G31810	224	111	0.95	0.669	47	154	0.0055	0.766	Bial	4
AT1G31817	351	109	0	0.763	258	151	0	0.369	PEG_LxC	4
AT1G31820	63	0	0	1	2	20	0.027	0.909	MEG_CxL	4
AT1G31830	34	13	0.4656	0.723	2	58	0	0.967	MEG_LxC	4
AT1G31835	12	10	0.2776	0.545	4	19	0.1476	0.826	Bial	3
AT1G31850	553	88	0	0.863	140	230	0.0977	0.622	MEG_CxL	4
AT1G31860	499	40	0	0.926	201	70	0	0.258	ColDom	4
AT1G31870	380	52	0	0.88	225	232	0	0.508	MEG_CxL	4
AT1G31910	2503	136	0	0.948	944	289	0	0.234	ColDom	0
AT1G31920	45	11	0.0435	0.804	32	54	0.5192	0.628	Bial	4
AT1G31930	1826	187	0	0.907	878	572	0	0.394	ColDom	4
AT1G31935	13	8	0.6909	0.619	0	39	0	1	MEG_LxC	NA
AT1G31940	29	17	0.651	0.63	5	58	0.0001	0.921	MEG_LxC	4
AT1G31950	67	16	0.0109	0.807	18	60	0.0825	0.769	Bial	NA
AT1G31970	21728	8939	0	0.709	12792	29137	0	0.695	Bial	7
AT1G31983	19	70	0	0.213	4	52	0.0001	0.929	LerDom	NA
AT1G32010	101	1	0	0.99	17	10	0.0023	0.37	ColDom	NA
AT1G32050	2394	711	0	0.771	735	1471	0.9942	0.667	Bial	4
AT1G32060	2457	860	0	0.741	682	1832	0	0.729	Bial	5
AT1G32070	236	51	0	0.822	76	157	0.8565	0.674	Bial	3
AT1G32120	54	15	0.0585	0.783	14	41	0.2778	0.745	Bial	4
AT1G32130	2879	984	0	0.745	2742	5991	0.0003	0.686	Bial	3
AT1G32150	347	77	0	0.818	185	198	0	0.517	Bial	7
AT1G32160	502	120	0	0.807	95	375	0	0.798	Bial	4
AT1G32170	459	29	0	0.941	50	299	0	0.857	MEG	0
AT1G32172	189	126	0.019	0.6	171	90	0	0.345	PEG_LxC	NA
AT1G32180	32	49	0	0.395	4	49	0.0002	0.925	LerDom	NA
AT1G32230	1211	424	0	0.741	474	1020	0.2466	0.683	Bial	1
AT1G32260	171	51	0.002	0.77	72	142	0.9394	0.664	Bial	11
AT1G32280	118	0	0	1	101	0	0	0	ColDom	NA
AT1G32310	140	50	0.0573	0.737	40	57	0.1401	0.588	Bial	3
AT1G32340	40	21	0.8803	0.656	31	65	0.8655	0.677	Bial	4
AT1G32360	52	5	0.0002	0.912	13	53	0.0313	0.803	MEG_CxL	4
AT1G32400	85	23	0.0129	0.787	39	41	0.0067	0.512	Bial	4
AT1G32410	146	33	0.0001	0.816	46	192	0	0.807	Bial	3
AT1G32440	12	10	0.2776	0.545	17	34	1	0.667	Bial	4
AT1G32450	47	38	0.0387	0.553	73	78	0.0002	0.517	Bial	6
AT1G32460	17	5	0.3451	0.773	9	18	1	0.667	Bial	NA
AT1G32520	311	112	0.0049	0.735	123	310	0.0475	0.716	Bial	1
AT1G32530	212	85	0.1135	0.714	100	250	0.088	0.714	Bial	0
AT1G32540	8820	2597	0	0.773	4991	6149	0	0.552	Bial	4
AT1G32610	18	18	0.049	0.5	6	17	0.5334	0.739	Bial	NA
AT1G32630	331	200	0.0495	0.623	377	659	0.0579	0.636	Bial	3
AT1G32740	630	248	0.0026	0.718	305	630	0.7059	0.674	Bial	5
AT1G32750	1262	544	0.0065	0.699	675	1296	0.462	0.658	Bial	4
AT1G32900	17	9	0.9099	0.654	17	29	0.6678	0.63	Bial	0
AT1G32920	94	7	0	0.931	6	65	0	0.915	MEG	5
AT1G32940	12	8	0.5803	0.6	15	10	0.0089	0.4	PEG_LxC	5
AT1G32950	44	8	0.01	0.846	20	26	0.1955	0.565	Bial	3
AT1G33040	104	32	0.0236	0.765	54	164	0.0134	0.752	Bial	NA
AT1G33265	198	34	0	0.853	71	150	0.7593	0.679	MEG_CxL	0
AT1G33290	180	68	0.0677	0.726	82	196	0.2314	0.705	Bial	4
AT1G33330	46	7	0.0034	0.868	38	63	0.4322	0.624	MEG_CxL	4
AT1G33360	583	153	0	0.792	272	445	0.0161	0.621	Bial	3
AT1G33470	406	6	0	0.985	1	178	0	0.994	MEG	4
AT1G33480	160	140	0	0.533	52	272	0	0.84	Bial	3
AT1G33490	302	1	0	0.997	105	14	0	0.118	ColDom	4
AT1G33500	24	35	0.0001	0.407	47	129	0.0925	0.733	PEG_CxL	4
AT1G33520	248	154	0.0497	0.617	205	800	0	0.796	Bial	3
AT1G33600	228	12	0	0.95	0	42	0	1	MEG	6
AT1G33615	159	92	0.3175	0.633	20	82	0.0064	0.804	Bial	NA
AT1G33680	682	360	0.4613	0.655	184	390	0.5879	0.679	Bial	4
AT1G33700	697	382	0.1893	0.646	181	404	0.2825	0.691	Bial	4
AT1G33720	23	4	0.0586	0.852	0	20	0.0032	1	MEG_LxC	NA
AT1G33770	409	86	0	0.826	110	121	0	0.524	Bial	3
AT1G33780	769	236	0	0.765	258	639	0.0072	0.712	Bial	4
AT1G33810	171	62	0.0432	0.734	97	170	0.3691	0.637	Bial	3
AT1G33940	4	168	0	0.023	8	175	0	0.956	LerDom	NA
AT1G33970	1509	735	0.6128	0.672	644	1533	0.0005	0.704	Bial	4
AT1G33980	827	208	0	0.799	462	816	0.0519	0.638	Bial	4
AT1G33990	35	12	0.3089	0.745	8	39	0.0297	0.83	Bial	4
AT1G34000	28	8	0.1986	0.778	3	29	0.0078	0.906	MEG_LxC	NA
AT1G34020	45	0	0	1	5	81	0	0.942	MEG	4
AT1G34030	246	59	0	0.807	93	109	0.0003	0.54	Bial	4
AT1G34060	36	11	0.1888	0.766	25	34	0.1912	0.576	Bial	4
AT1G34065	76	46	0.3605	0.623	44	117	0.1491	0.727	Bial	10
AT1G34100	5	27	0	0.156	3	48	0.0001	0.941	LerDom	NA
AT1G34110	205	78	0.0564	0.724	172	325	0.6169	0.654	Bial	5
AT1G34120	80	53	0.1448	0.602	30	120	0.0012	0.8	Bial	4
AT1G34130	60	25	0.4995	0.706	15	40	0.4125	0.727	Bial	1
AT1G34150	167	33	0	0.835	73	167	0.41	0.696	Bial	1
AT1G34160	97	22	0.0012	0.815	70	67	0	0.489	PEG_LxC	3
AT1G34170	2734	660	0	0.806	156	1832	0	0.922	poMEG	NA
AT1G34210	1858	676	0	0.733	792	1615	0.7163	0.671	Bial	3
AT1G34220	406	53	0	0.885	171	129	0	0.43	ColDom	3
AT1G34245	113	8	0	0.934	16	33	0.9367	0.673	MEG_CxL	0
AT1G34260	117	15	0	0.886	55	148	0.0886	0.729	MEG_CxL	4
AT1G34310	324	0	0	1	0	603	0	1	MEG	NA
AT1G34315	40	20	1	0.667	45	23	0	0.338	PEG_LxC	NA
AT1G34320	237	92	0.0556	0.72	39	127	0.0131	0.765	Bial	1
AT1G34340	1092	100	0	0.916	277	309	0	0.527	MEG_CxL	4
AT1G34355	65	23	0.1926	0.739	29	101	0.0139	0.777	Bial	4
AT1G34360	424	88	0	0.828	196	181	0	0.48	PEG_LxC	3
AT1G34390	398	2	0	0.995	3	133	0	0.978	MEG	NA
AT1G34420	44	9	0.0182	0.83	47	16	0	0.254	PEG_LxC	NA
AT1G34480	0	21	0	0	0	22	0.002	1	LerDom	NA
AT1G34500	3	18	0	0.143	0	28	0.0005	1	LerDom	NA
AT1G34530	34	12	0.3512	0.739	5	24	0.0976	0.828	Bial	NA
AT1G34550	311	125	0.0557	0.713	98	265	0.0185	0.73	Bial	6
AT1G34570	68	24	0.1791	0.739	14	36	0.4972	0.72	Bial	4
AT1G34580	442	1	0	0.998	2	206	0	0.99	MEG	0
AT1G34630	171	163	0	0.512	58	271	0	0.824	Bial	4
AT1G34640	176	7	0	0.962	1	185	0	0.995	MEG	2
AT1G34670	39	9	0.0467	0.812	0	21	0.0025	1	MEG_LxC	NA
AT1G34750	145	1	0	0.993	22	6	0	0.214	ColDom	1
AT1G34770	242	100	0.1418	0.708	226	220	0	0.493	PEG_LxC	2
AT1G34780	118	25	0.0001	0.825	86	82	0	0.488	PEG_LxC	4
AT1G34790	1544	325	0	0.826	587	485	0	0.452	PEG_LxC	4
AT1G34842	67	0	0	1	27	0	0	0	ColDom	NA
AT1G35115	1729	0	0	1	559	0	0	0	ColDom	NA
AT1G35146	23	14	0.6133	0.622	1	27	0.0018	0.964	MEG_LxC	NA
AT1G35160	713	133	0	0.843	396	553	0	0.583	Bial	10
AT1G35180	56	0	0	1	0	36	0.0001	1	MEG	NA
AT1G35183	5	105	0	0.045	84	8	0	0.087	PEG	NA
AT1G35186	31	12	0.5068	0.721	2	69	0	0.972	MEG_LxC	NA
AT1G35220	754	213	0	0.78	303	454	0.0002	0.6	Bial	4
AT1G35240	653	0	0	1	0	367	0	1	MEG	NA
AT1G35242	898	21	0	0.977	7	351	0	0.98	MEG	NA
AT1G35320	835	0	0	1	390	0	0	0	ColDom	0
AT1G35450	67	0	0	1	16	6	0.0002	0.273	ColDom	NA
AT1G35513	228	194	0	0.54	124	168	0.002	0.575	Bial	NA
AT1G35516	1420	342	0	0.806	598	673	0	0.53	Bial	0
AT1G35520	707	0	0	1	0	1115	0	1	MEG	NA
AT1G35530	64	29	0.7062	0.688	23	49	0.844	0.681	Bial	4
AT1G35580	68	15	0.0055	0.819	8	27	0.2475	0.771	Bial	4
AT1G35612	1081	8	0	0.993	60	30	0	0.333	ColDom	NA
AT1G35620	17	7	0.7106	0.708	7	23	0.311	0.767	Bial	4
AT1G35625	27	2	0.0045	0.931	8	17	0.9141	0.68	MEG_CxL	3
AT1G35660	89	31	0.1095	0.742	79	99	0.0036	0.556	Bial	4
AT1G35670	83	47	0.5499	0.638	53	180	0.0014	0.773	Bial	4
AT1G35680	226	186	0	0.549	58	222	0	0.793	Bial	4
AT1G35710	289	13	0	0.957	30	92	0.0631	0.754	MEG_CxL	5
AT1G35760	79	8	0	0.908	35	35	0.0061	0.5	ColDom	NA
AT1G35770	108	16	0	0.871	18	107	0	0.856	MEG	NA
AT1G35780	42	10	0.0452	0.808	45	40	0.0003	0.471	PEG_LxC	6
AT1G35790	82	8	0	0.911	2	29	0.0031	0.935	MEG	NA
AT1G35840	51	8	0.0024	0.864	21	12	0.0005	0.364	ColDom	NA
AT1G35960	72	0	0	1	20	10	0.0003	0.333	ColDom	NA
AT1G36000	52	82	0	0.388	25	16	0.0004	0.39	PEG	NA
AT1G36010	23	8	0.4305	0.742	16	36	0.7523	0.692	Bial	NA
AT1G36035	49	6	0.0008	0.891	9	19	0.9182	0.679	MEG_CxL	NA
AT1G36040	73	27	0.2236	0.73	21	73	0.0388	0.777	Bial	NA
AT1G36060	75	38	0.9571	0.664	0	146	0	1	MEG_LxC	5
AT1G36070	159	56	0.035	0.74	19	205	0	0.915	MEG_LxC	1
AT1G36105	29	0	0.0003	1	21	2	0	0.087	ColDom	NA
AT1G36160	234	99	0.2052	0.703	98	407	0	0.806	Bial	4
AT1G36180	260	156	0.097	0.625	87	247	0.009	0.74	Bial	4
AT1G36280	79	44	0.6183	0.642	7	67	0	0.905	MEG_LxC	1
AT1G36600	25	53	0	0.321	10	42	0.0494	0.808	PEG_CxL	NA
AT1G36620	11	31	0	0.262	21	43	0.9439	0.672	PEG_CxL	NA
AT1G36630	64	26	0.428	0.711	14	14	0.0915	0.5	Bial	NA
AT1G36730	93	13	0	0.877	2	49	0	0.961	MEG	NA
AT1G36732	93	13	0	0.877	2	49	0	0.961	MEG	NA
AT1G40091	37	2	0.0004	0.949	21	3	0	0.125	ColDom	NA
AT1G41830	98	4	0	0.961	21	171	0	0.891	MEG	0
AT1G42110	8	58	0	0.121	0	167	0	1	LerDom	NA
AT1G42430	530	164	0	0.764	241	625	0.0013	0.722	Bial	4
AT1G42470	24	7	0.2516	0.774	0	33	0.0001	1	MEG_LxC	4
AT1G42490	28	0	0.0004	1	10	11	0.2197	0.524	MEG_CxL	NA
AT1G42540	51	14	0.0618	0.785	26	32	0.0941	0.552	Bial	4
AT1G42550	1407	386	0	0.785	374	1769	0	0.825	Bial	4
AT1G42650	35	0	0.0001	1	34	18	0	0.346	ColDom	NA
AT1G42888	37	5	0.0056	0.881	19	5	0	0.208	ColDom	NA
AT1G42960	60	31	0.9032	0.659	27	27	0.0167	0.5	Bial	0
AT1G42970	53	5	0.0001	0.914	16	25	0.5127	0.61	MEG_CxL	6
AT1G42980	2487	910	0	0.732	1146	1268	0	0.525	Bial	6
AT1G42990	213	25	0	0.895	90	187	0.8142	0.675	MEG_CxL	4
AT1G43000	300	21	0	0.935	15	297	0	0.952	MEG	6
AT1G43005	56	15	0.0427	0.789	15	15	0.0798	0.5	Bial	3
AT1G43030	23	0	0.0013	1	0	34	0.0001	1	MEG	NA
AT1G43060	51	39	0.0624	0.567	0	24	0.0012	1	MEG_LxC	NA
AT1G43170	2578	1135	0.0007	0.694	1348	2605	0.3768	0.659	Bial	3
AT1G43190	55	18	0.1508	0.753	13	70	0.0014	0.843	Bial	4
AT1G43245	71	22	0.0671	0.763	9	120	0	0.93	MEG_LxC	5
AT1G43580	326	25	0	0.929	288	194	0	0.402	ColDom	12
AT1G43620	392	122	0	0.763	134	216	0.0753	0.617	Bial	4
AT1G43640	20	0	0.0029	1	12	25	0.9279	0.676	MEG_CxL	7
AT1G43665	67	26	0.3245	0.72	107	184	0.276	0.632	Bial	3
AT1G43670	305	83	0	0.786	130	200	0.0325	0.606	Bial	0
AT1G43700	341	129	0.0112	0.726	93	199	0.6577	0.682	Bial	4
AT1G43730	32	9	0.1578	0.78	0	25	0.0009	1	MEG_LxC	NA
AT1G43770	670	29	0	0.959	418	92	0	0.18	ColDom	1
AT1G43800	92	29	0.0423	0.76	6	37	0.0129	0.86	Bial	1
AT1G43850	751	320	0.0252	0.701	355	860	0.0047	0.708	Bial	4
AT1G43886	104	11	0	0.904	10	97	0	0.907	MEG	NA
AT1G43890	921	222	0	0.806	439	620	0	0.585	Bial	4
AT1G43900	143	83	0.3327	0.633	106	345	0	0.765	Bial	4
AT1G43910	26	23	0.0614	0.531	24	91	0.0087	0.791	Bial	5
AT1G43970	44	0	0	1	2	55	0	0.965	MEG	NA
AT1G44000	31	29	0.0213	0.517	11	18	0.6653	0.621	Bial	3
AT1G44100	287	48	0	0.857	70	116	0.2757	0.624	MEG_CxL	5
AT1G44110	70	25	0.1866	0.737	34	49	0.1907	0.59	Bial	4
AT1G44120	109	43	0.2329	0.717	41	85	0.8831	0.675	Bial	5
AT1G44125	90	22	0.0038	0.804	34	69	0.9555	0.67	Bial	NA
AT1G44130	78	57	0.0418	0.578	23	57	0.4572	0.712	Bial	NA
AT1G44191	60	19	0.108	0.759	6	66	0	0.917	MEG_LxC	NA
AT1G44446	98	53	0.6926	0.649	22	49	0.7344	0.69	Bial	4
AT1G44510	11	125	0	0.081	12	70	0.0008	0.854	LerDom	NA
AT1G44575	312	97	0.0001	0.763	102	242	0.1994	0.703	Bial	5
AT1G44740	233	15	0	0.94	131	9	0	0.064	ColDom	0
AT1G44750	228	41	0	0.848	124	232	0.6188	0.652	Bial	5
AT1G44760	75	74	0.0001	0.503	40	66	0.4084	0.623	Bial	4
AT1G44770	445	42	0	0.914	156	143	0	0.478	ColDom	10
AT1G44780	101	227	0	0.308	181	86	0	0.322	PEG	6
AT1G44810	194	41	0	0.826	16	147	0	0.902	poMEG	4
AT1G44820	32	10	0.2361	0.762	15	40	0.4125	0.727	Bial	0
AT1G44835	467	209	0.2277	0.691	221	537	0.0252	0.708	Bial	4
AT1G44910	23862	11935	0.9821	0.667	28998	69312	0	0.705	Bial	4
AT1G44920	525	41	0	0.928	216	64	0	0.229	ColDom	3
AT1G44940	3	46	0	0.061	1	169	0	0.994	LerDom	9
AT1G44941	19	9	0.9133	0.679	11	9	0.0622	0.45	Bial	NA
AT1G44960	106	44	0.3529	0.707	43	83	0.8831	0.659	Bial	4
AT1G45000	130	24	0	0.844	46	53	0.0104	0.535	Bial	0
AT1G45010	62	0	0	1	0	27	0.0006	1	MEG	NA
AT1G45050	828	95	0	0.897	631	396	0	0.386	ColDom	4
AT1G45120	49	27	0.7294	0.645	31	7	0	0.184	PEG_LxC	NA
AT1G45130	520	23	0	0.958	97	210	0.5903	0.684	MEG_CxL	4
AT1G45160	479	218	0.3012	0.687	293	423	0	0.591	Bial	0
AT1G45163	55	2	0	0.965	34	0	0	0	ColDom	0
AT1G45165	50	2	0	0.962	27	0	0	0	ColDom	NA
AT1G45170	17	11	0.5587	0.607	5	45	0.0011	0.9	MEG_LxC	6
AT1G45180	67	16	0.0109	0.807	20	36	0.7609	0.643	Bial	4
AT1G45207	63	31	0.9525	0.67	14	66	0.0053	0.825	Bial	NA
AT1G45229	93	19	0.0005	0.83	9	74	0	0.892	poMEG	NA
AT1G45231	44	41	0.0061	0.518	14	77	0.0007	0.846	Bial	NA
AT1G45233	86	21	0.0046	0.804	24	32	0.179	0.571	Bial	NA
AT1G45248	20	8	0.6433	0.714	3	23	0.0308	0.885	Bial	5
AT1G45249	224	10	0	0.957	14	109	0	0.886	MEG	4
AT1G45474	157	146	0	0.518	41	171	0	0.807	Bial	4
AT1G46552	194	22	0	0.898	17	41	0.5878	0.707	MEG_CxL	NA
AT1G46554	60	5	0	0.923	18	7	0.0001	0.28	ColDom	NA
AT1G47056	57	28	0.9503	0.671	39	75	0.877	0.658	Bial	2
AT1G47128	114	12	0	0.905	6	179	0	0.968	MEG	4
AT1G47200	365	113	0	0.764	194	588	0	0.752	Bial	0
AT1G47230	141	30	0	0.825	19	101	0.0001	0.842	Bial	3
AT1G47250	68	12	0.001	0.85	50	62	0.0195	0.554	MEG_CxL	4
AT1G47260	138	67	0.8687	0.673	72	129	0.5272	0.642	Bial	0
AT1G47270	565	131	0	0.812	253	176	0	0.41	PEG_LxC	1
AT1G47278	167	53	0.0063	0.759	100	285	0.0044	0.74	Bial	1
AT1G47300	95	50	0.8043	0.655	56	141	0.1952	0.716	Bial	NA
AT1G47310	65	48	0.056	0.575	14	25	0.7861	0.641	Bial	5
AT1G47317	40	0	0	1	58	0	0	0	ColDom	2
AT1G47330	239	109	0.4824	0.687	87	289	0.0001	0.769	Bial	4
AT1G47340	52	45	0.0105	0.536	45	70	0.246	0.609	Bial	5
AT1G47380	120	26	0.0002	0.822	76	182	0.2455	0.705	Bial	4
AT1G47410	301	48	0	0.862	100	163	0.15	0.62	MEG_CxL	NA
AT1G47420	1033	164	0	0.863	372	513	0	0.58	MEG_CxL	3
AT1G47500	118	708	0	0.143	513	72	0	0.123	PEG	12
AT1G47530	503	391	0	0.563	264	396	0.0007	0.6	Bial	12
AT1G47550	25	5	0.0734	0.833	28	70	0.3882	0.714	Bial	7
AT1G47565	85	0	0	1	48	0	0	0	ColDom	NA
AT1G47570	1228	255	0	0.828	571	560	0	0.495	PEG_LxC	4
AT1G47578	15	8	0.9035	0.652	7	13	0.9039	0.65	Bial	4
AT1G47580	17	20	0.0122	0.459	14	38	0.3982	0.731	Bial	0
AT1G47640	120	24	0.0001	0.833	63	64	0.0003	0.504	Bial	4
AT1G47720	98	1	0	0.99	42	8	0	0.16	ColDom	4
AT1G47740	41	22	0.8213	0.651	25	28	0.0518	0.528	Bial	8
AT1G47750	137	105	0.0017	0.566	83	193	0.317	0.699	Bial	5
AT1G47760	65	9	0.0002	0.878	15	75	0.0018	0.833	poMEG	5
AT1G47770	33	14	0.655	0.702	13	15	0.1921	0.536	Bial	NA
AT1G47810	45	11	0.0435	0.804	38	60	0.3199	0.612	Bial	7
AT1G47860	59	18	0.0875	0.766	5	53	0.0002	0.914	MEG_LxC	NA
AT1G47900	127	33	0.0013	0.794	80	103	0.0057	0.563	Bial	4
AT1G47910	18	11	0.649	0.621	16	23	0.3787	0.59	Bial	NA
AT1G47920	6	64	0	0.086	75	15	0	0.167	PEG	0
AT1G47960	126	19	0	0.869	63	78	0.0082	0.553	MEG_CxL	4
AT1G48020	863	212	0	0.803	415	8	0	0.019	PEG_LxC	NA
AT1G48030	391	108	0	0.784	156	214	0.0007	0.578	Bial	4
AT1G48040	237	168	0.001	0.585	117	320	0.0071	0.732	Bial	NA
AT1G48050	266	142	0.5817	0.652	87	216	0.1264	0.713	Bial	4
AT1G48230	191	107	0.4023	0.641	48	162	0.0027	0.771	Bial	1
AT1G48270	213	142	0.0125	0.6	64	190	0.0111	0.748	Bial	4
AT1G48280	70	54	0.0243	0.565	61	115	0.7641	0.653	Bial	4
AT1G48300	852	371	0.0387	0.697	358	889	0.0012	0.713	Bial	1
AT1G48310	112	111	0	0.502	114	154	0.0029	0.575	Bial	4
AT1G48315	150	18	0	0.893	33	161	0	0.83	poMEG	NA
AT1G48320	86	15	0.0002	0.851	10	107	0	0.915	MEG	0
AT1G48350	65	18	0.0363	0.783	12	26	0.8579	0.684	Bial	4
AT1G48410	199	65	0.0047	0.754	42	150	0.0017	0.781	Bial	4
AT1G48420	300	58	0	0.838	135	327	0.0907	0.708	Bial	3
AT1G48430	60	14	0.0138	0.811	10	32	0.2493	0.762	Bial	4
AT1G48440	200	34	0	0.855	70	145	0.8502	0.674	MEG_CxL	0
AT1G48450	648	454	0	0.588	356	775	0.244	0.685	Bial	3
AT1G48460	293	72	0	0.803	137	361	0.0109	0.725	Bial	4
AT1G48520	88	64	0.0327	0.579	29	83	0.1353	0.741	Bial	0
AT1G48560	14	44	0	0.241	18	51	0.2624	0.739	PEG_CxL	NA
AT1G48598	89	40	0.627	0.69	7	78	0	0.918	MEG_LxC	NA
AT1G48600	89	40	0.627	0.69	7	78	0	0.918	MEG_LxC	NA
AT1G48610	27	0	0.0005	1	10	13	0.3724	0.565	MEG_CxL	5
AT1G48620	327	154	0.5931	0.68	84	385	0	0.821	Bial	4
AT1G48625	173	107	0.1116	0.618	148	175	0	0.542	Bial	NA
AT1G48630	51	56	0.0001	0.477	29	61	0.8616	0.678	PEG_CxL	4
AT1G48635	72	62	0.0027	0.537	21	68	0.0779	0.764	Bial	4
AT1G48650	64	25	0.3479	0.719	29	115	0.0017	0.799	Bial	1
AT1G48670	45	14	0.1526	0.763	0	65	0	1	MEG_LxC	NA
AT1G48740	128	31	0.0005	0.805	116	108	0	0.482	PEG_LxC	4
AT1G48750	56	6	0.0002	0.903	6	114	0	0.95	MEG	NA
AT1G48760	1400	933	0	0.6	1158	3668	0	0.76	Bial	4
AT1G48770	40	0	0	1	37	1	0	0.026	ColDom	NA
AT1G48780	68	59	0.0031	0.535	10	147	0	0.936	MEG_LxC	NA
AT1G48790	192	59	0.0018	0.765	141	260	0.5107	0.648	Bial	4
AT1G48830	634	220	0	0.742	233	601	0.0021	0.721	Bial	3
AT1G48840	429	119	0	0.783	226	272	0	0.546	Bial	4
AT1G48850	1143	190	0	0.857	398	622	0.0003	0.61	MEG_CxL	4
AT1G48870	18	5	0.2889	0.783	0	25	0.0009	1	MEG_LxC	NA
AT1G48880	63	30	0.8529	0.677	14	75	0.001	0.843	Bial	4
AT1G48900	25	13	0.9251	0.658	4	20	0.1201	0.833	Bial	4
AT1G48910	51	96	0	0.347	229	40	0	0.149	PEG	12
AT1G48920	8250	4269	0.0936	0.659	4200	8743	0.0524	0.676	Bial	3
AT1G48930	249	106	0.2072	0.701	268	375	0	0.583	Bial	1
AT1G48940	29	1	0.001	0.967	26	26	0.019	0.5	MEG_CxL	0
AT1G49010	1142	567	0.9112	0.668	825	2972	0	0.783	Bial	0
AT1G49040	415	142	0.0002	0.745	195	398	0.8561	0.671	Bial	1
AT1G49050	146	116	0.0004	0.557	59	140	0.338	0.704	Bial	4
AT1G49110	39	8	0.027	0.83	21	19	0.018	0.475	Bial	0
AT1G49140	196	55	0.0003	0.781	47	124	0.1476	0.725	Bial	1
AT1G49160	1766	638	0	0.735	2114	3866	0.002	0.646	Bial	4
AT1G49170	58	23	0.4019	0.716	26	42	0.4635	0.618	Bial	NA
AT1G49180	98	47	0.8433	0.676	21	58	0.2638	0.734	Bial	4
AT1G49190	92	163	0	0.361	59	95	0.2491	0.617	PEG_CxL	12
AT1G49240	571	142	0	0.801	238	411	0.1045	0.633	Bial	4
AT1G49250	35	145	0	0.194	83	78	0	0.484	PEG	6
AT1G49270	43	4	0.0006	0.915	23	1	0	0.042	ColDom	NA
AT1G49290	113	75	0.078	0.601	346	15	0	0.042	PEG_LxC	NA
AT1G49340	121	48	0.2176	0.716	53	107	0.9651	0.669	Bial	4
AT1G49350	224	23	0	0.907	43	99	0.5136	0.697	MEG_CxL	3
AT1G49360	314	29	0	0.915	176	57	0	0.245	ColDom	4
AT1G49380	117	37	0.0221	0.76	18	80	0.0035	0.816	Bial	4
AT1G49400	85	42	0.9596	0.669	57	71	0.0132	0.555	Bial	4
AT1G49410	137	63	0.6333	0.685	59	52	0	0.468	PEG_LxC	3
AT1G49450	281	0	0	1	2	60	0	0.968	MEG	1
AT1G49475	18	15	0.1783	0.545	20	102	0.0002	0.836	Bial	6
AT1G49480	585	206	0	0.74	230	410	0.2171	0.641	Bial	1
AT1G49490	48	14	0.0983	0.774	18	2	0	0.1	PEG_LxC	1
AT1G49510	97	22	0.0012	0.815	28	44	0.3882	0.611	Bial	4
AT1G49520	49	19	0.4018	0.721	48	33	0	0.407	PEG_LxC	3
AT1G49530	69	0	0	1	22	48	0.7873	0.686	MEG_CxL	3
AT1G49540	241	105	0.2893	0.697	134	254	0.6802	0.655	Bial	4
AT1G49560	69	2	0	0.972	21	173	0	0.892	MEG	4
AT1G49600	8	59	0	0.119	15	12	0.0245	0.444	PEG_CxL	12
AT1G49620	652	311	0.549	0.677	1015	1909	0.1584	0.653	Bial	1
AT1G49630	149	98	0.0498	0.603	48	252	0	0.84	Bial	4
AT1G49650	53	21	0.4226	0.716	11	32	0.3498	0.744	Bial	5
AT1G49660	71	10	0.0001	0.877	23	56	0.5001	0.709	MEG_CxL	4
AT1G49670	685	315	0.2678	0.685	368	746	0.8684	0.67	Bial	NA
AT1G49700	156	120	0.0007	0.565	64	285	0	0.817	Bial	8
AT1G49770	4208	894	0	0.825	568	13355	0	0.959	poMEG	7
AT1G49810	34	17	1	0.667	11	43	0.067	0.796	Bial	NA
AT1G49840	110	2	0	0.982	19	25	0.2208	0.568	MEG_CxL	3
AT1G49860	112	0	0	1	0	123	0	1	MEG	3
AT1G49870	138	37	0.0012	0.789	157	108	0	0.408	PEG_LxC	3
AT1G49880	28	3	0.0087	0.903	19	10	0.0006	0.345	ColDom	NA
AT1G49900	47	17	0.3025	0.734	9	53	0.0035	0.855	MEG_LxC	NA
AT1G49910	28	12	0.7013	0.7	13	20	0.5329	0.606	Bial	1
AT1G49920	32	31	0.0123	0.508	19	67	0.0435	0.779	Bial	NA
AT1G49940	310	195	0.0186	0.614	139	290	0.7411	0.676	Bial	3
AT1G49950	1947	849	0.0017	0.696	1341	2883	0.0462	0.683	Bial	4
AT1G49975	75	16	0.0026	0.824	19	26	0.2669	0.578	Bial	3
AT1G49980	188	62	0.0072	0.752	49	235	0	0.827	Bial	4
AT1G49990	83	22	0.0117	0.79	19	101	0.0001	0.842	Bial	6
AT1G50000	388	111	0	0.778	66	214	0.0012	0.764	Bial	5
AT1G50020	93	26	0.0128	0.782	13	45	0.113	0.776	Bial	3
AT1G50030	88	31	0.1221	0.739	36	81	0.6252	0.692	Bial	4
AT1G50040	136	39	0.0035	0.777	26	92	0.0165	0.78	Bial	4
AT1G50055	44	67	0	0.396	0	56	0	1	LerDom	NA
AT1G50090	18	10	0.8213	0.643	34	6	0	0.15	PEG_LxC	NA
AT1G50110	320	189	0.0941	0.629	119	305	0.0353	0.719	Bial	4
AT1G50120	64	14	0.0068	0.821	62	25	0	0.287	PEG_LxC	4
AT1G50140	586	265	0.2184	0.689	217	441	0.8808	0.67	Bial	4
AT1G50170	260	66	0	0.798	25	224	0	0.9	poMEG	4
AT1G50200	32	6	0.0327	0.842	4	16	0.2669	0.8	Bial	4
AT1G50240	26	7	0.1783	0.788	3	34	0.0024	0.919	MEG_LxC	NA
AT1G50250	54	14	0.0382	0.794	25	11	0	0.306	PEG_LxC	0
AT1G50260	213	110	0.8163	0.659	94	206	0.5348	0.687	Bial	4
AT1G50270	56	55	0.0006	0.505	47	107	0.5318	0.695	Bial	4
AT1G50280	51	16	0.1327	0.761	14	25	0.7861	0.641	Bial	NA
AT1G50290	126	20	0	0.863	69	404	0	0.854	MEG	3
AT1G50300	883	331	0	0.727	458	847	0.2338	0.649	Bial	4
AT1G50340	12	43	0	0.218	0	70	0	1	LerDom	NA
AT1G50360	243	55	0	0.815	84	259	0.0012	0.755	Bial	0
AT1G50390	107	10	0	0.915	28	16	0.0001	0.364	ColDom	NA
AT1G50430	585	280	0.6002	0.676	232	565	0.02	0.709	Bial	4
AT1G50440	185	34	0	0.845	49	82	0.3942	0.626	Bial	4
AT1G50450	112	32	0.0079	0.778	32	61	0.8635	0.656	Bial	4
AT1G50460	509	153	0	0.769	200	404	0.9287	0.669	Bial	1
AT1G50480	53	10	0.0057	0.841	7	16	0.815	0.696	Bial	4
AT1G50490	106	17	0	0.862	20	39	0.9416	0.661	MEG_CxL	4
AT1G50510	259	169	0.0114	0.605	130	365	0.0019	0.737	Bial	4
AT1G50570	159	24	0	0.869	38	125	0.0123	0.767	MEG_CxL	4
AT1G50600	131	79	0.2334	0.624	48	138	0.0472	0.742	Bial	3
AT1G50610	60	4	0	0.938	39	2	0	0.049	ColDom	NA
AT1G50620	40	15	0.3962	0.727	9	16	0.823	0.64	Bial	4
AT1G50630	159	61	0.105	0.723	23	105	0.0006	0.82	Bial	NA
AT1G50640	147	48	0.0157	0.754	108	178	0.1565	0.622	Bial	5
AT1G50700	50	35	0.1614	0.588	22	74	0.0486	0.771	Bial	4
AT1G50710	145	40	0.0014	0.784	42	177	0	0.808	Bial	4
AT1G50730	62	23	0.269	0.729	15	70	0.0044	0.824	Bial	4
AT1G50750	39	1	0.0001	0.975	4	19	0.1476	0.826	MEG_CxL	1
AT1G50840	439	301	0.0001	0.593	325	731	0.1134	0.692	Bial	NA
AT1G50900	241	120	0.9769	0.668	158	195	0	0.552	Bial	3
AT1G50910	239	120	0.9769	0.666	157	197	0	0.556	Bial	3
AT1G50920	743	129	0	0.852	364	435	0	0.544	MEG_CxL	3
AT1G50950	49	45	0.0049	0.521	36	59	0.418	0.621	Bial	2
AT1G50980	941	441	0.3146	0.681	525	923	0.0307	0.637	Bial	NA
AT1G50990	37	19	0.9386	0.661	19	22	0.1124	0.537	Bial	NA
AT1G51370	101	42	0.37	0.706	21	149	0	0.876	MEG_LxC	0
AT1G51380	204	253	0	0.446	117	387	0	0.768	PEG_CxL	4
AT1G51390	24	4	0.0472	0.857	13	26	1	0.667	Bial	3
AT1G51400	1024	166	0	0.861	343	572	0.014	0.625	MEG_CxL	0
AT1G51402	786	101	0	0.886	260	419	0.0114	0.617	MEG_CxL	3
AT1G51410	21	8	0.5653	0.724	54	44	0	0.449	PEG_LxC	NA
AT1G51420	66	47	0.0858	0.584	13	134	0	0.912	MEG_LxC	0
AT1G51440	58	10	0.0021	0.853	9	19	0.9182	0.679	MEG_CxL	2
AT1G51450	145	37	0.0004	0.797	92	151	0.1837	0.621	Bial	3
AT1G51460	296	17	0	0.946	10	69	0.0003	0.873	MEG	3
AT1G51490	18	18	0.049	0.5	12	8	0.02	0.4	Bial	NA
AT1G51500	352	0	0	1	4	87	0	0.956	MEG	4
AT1G51510	262	293	0	0.472	179	564	0	0.759	PEG_CxL	3
AT1G51600	21	10	0.9177	0.677	10	47	0.02	0.825	Bial	4
AT1G51630	940	1209	0	0.437	577	2759	0	0.827	PEG_CxL	4
AT1G51640	41	8	0.0182	0.837	2	18	0.0433	0.9	Bial	0
AT1G51645	41	8	0.0182	0.837	2	18	0.0433	0.9	Bial	NA
AT1G51650	311	56	0	0.847	109	324	0.0008	0.748	Bial	3
AT1G51800	25	9	0.4522	0.735	2	24	0.0104	0.923	Bial	NA
AT1G51805	226	0	0	1	9	30	0.2308	0.769	MEG_CxL	NA
AT1G51830	18	3	0.0878	0.857	13	8	0.0103	0.381	Bial	NA
AT1G51860	11	9	0.3212	0.55	7	19	0.5603	0.731	Bial	NA
AT1G51880	48	6	0.001	0.889	2	22	0.0167	0.917	MEG_CxL	NA
AT1G51900	69	2	0	0.972	6	49	0.001	0.891	MEG	NA
AT1G51910	215	128	0.1526	0.627	171	185	0	0.52	Bial	3
AT1G51960	222	145	0.019	0.605	74	255	0.0001	0.775	Bial	4
AT1G51965	172	63	0.049	0.732	64	142	0.5627	0.689	Bial	4
AT1G51980	120	9	0	0.93	38	134	0.0036	0.779	poMEG	0
AT1G52030	86	102	0	0.457	106	666	0	0.863	LerDom	3
AT1G52150	158	77	0.8779	0.672	10	145	0	0.935	MEG_LxC	4
AT1G52160	93	42	0.6347	0.689	39	83	0.7991	0.68	Bial	4
AT1G52190	105	22	0.0003	0.827	21	93	0.0016	0.816	Bial	6
AT1G52220	1220	458	0	0.727	386	1022	0	0.726	Bial	3
AT1G52230	50	27	0.7856	0.649	12	29	0.6482	0.707	Bial	NA
AT1G52240	195	38	0	0.837	105	34	0	0.245	PEG_LxC	7
AT1G52280	62	17	0.0384	0.785	0	293	0	1	MEG_LxC	0
AT1G52290	120	8	0	0.938	5	53	0.0002	0.914	MEG	4
AT1G52300	28	3	0.0087	0.903	22	12	0.0003	0.353	ColDom	0
AT1G52320	534	117	0	0.82	416	574	0	0.58	Bial	5
AT1G52360	62	22	0.2071	0.738	8	60	0.0004	0.882	MEG_LxC	4
AT1G52370	358	180	0.9607	0.665	137	383	0.0016	0.737	Bial	0
AT1G52380	447	127	0	0.779	432	862	0.9762	0.666	Bial	0
AT1G52400	118	6	0	0.952	8	32	0.1077	0.8	MEG_CxL	8
AT1G52410	38	2	0.0003	0.95	3	72	0	0.96	MEG	3
AT1G52420	232	106	0.4981	0.686	51	140	0.0787	0.733	Bial	3
AT1G52470	237	6	0	0.975	0	295	0	1	MEG	NA
AT1G52490	23	41	0	0.359	7	41	0.0109	0.854	PEG_CxL	NA
AT1G52500	766	303	0.0011	0.717	240	582	0.0207	0.708	Bial	4
AT1G52510	211	86	0.1433	0.71	54	103	0.8233	0.656	Bial	4
AT1G52520	63	0	0	1	11	15	0.4034	0.577	MEG_CxL	4
AT1G52540	446	211	0.5624	0.679	200	316	0.016	0.612	Bial	3
AT1G52565	159	18	0	0.898	2	117	0	0.983	MEG	6
AT1G52570	182	48	0.0001	0.791	16	130	0	0.89	poMEG	5
AT1G52590	51	29	0.6312	0.638	41	72	0.5785	0.637	Bial	4
AT1G52615	30	0	0.0002	1	31	0	0	0	ColDom	NA
AT1G52618	560	4	0	0.993	235	32	0	0.12	ColDom	NA
AT1G52640	46	10	0.0218	0.821	80	107	0.0114	0.572	Bial	1
AT1G52650	62	1	0	0.984	68	3	0	0.042	ColDom	4
AT1G52670	231	150	0.0195	0.606	89	220	0.1304	0.712	Bial	0
AT1G52710	65	29	0.6587	0.691	20	58	0.2017	0.744	Bial	NA
AT1G52720	82	72	0.0008	0.532	47	46	0.001	0.495	poPEG	4
AT1G52730	318	155	0.8262	0.672	189	219	0	0.537	Bial	4
AT1G52760	254	6	0	0.977	78	95	0.0022	0.549	MEG_CxL	3
AT1G52870	247	48	0	0.837	87	146	0.2541	0.627	Bial	0
AT1G52880	41	0	0	1	0	69	0	1	MEG	NA
AT1G52890	274	137	1	0.667	319	429	0	0.574	Bial	4
AT1G52905	169	8	0	0.955	122	4	0	0.032	ColDom	0
AT1G52920	72	33	0.7241	0.686	56	22	0	0.282	PEG_LxC	4
AT1G52930	712	288	0.0042	0.712	360	757	0.5073	0.678	Bial	4
AT1G52940	21	1	0.0071	0.955	21	21	0.0361	0.5	MEG_CxL	NA
AT1G52980	740	390	0.4563	0.655	348	856	0.0024	0.711	Bial	NA
AT1G53000	171	47	0.0005	0.784	58	196	0.0009	0.772	Bial	5
AT1G53110	135	55	0.2467	0.711	64	188	0.0137	0.746	Bial	0
AT1G53165	503	122	0	0.805	266	405	0.0012	0.604	Bial	4
AT1G53170	202	23	0	0.898	111	372	0	0.77	poMEG	8
AT1G53180	22	14	0.5349	0.611	8	15	0.9106	0.652	Bial	NA
AT1G53190	277	126	0.4355	0.687	146	249	0.1735	0.63	Bial	4
AT1G53200	50	36	0.124	0.581	51	44	0.0001	0.463	PEG_LxC	3
AT1G53210	281	24	0	0.921	136	57	0	0.295	ColDom	4
AT1G53230	15	19	0.0089	0.441	6	54	0.0003	0.9	LerDom	4
AT1G53240	19	18	0.0676	0.514	15	37	0.5647	0.712	Bial	4
AT1G53250	1085	476	0.0264	0.695	931	1591	0.0003	0.631	Bial	3
AT1G53260	310	138	0.3085	0.692	63	242	0	0.793	Bial	NA
AT1G53280	281	147	0.7033	0.657	114	196	0.259	0.632	Bial	1
AT1G53282	73	122	0	0.374	182	448	0.0302	0.711	PEG_CxL	0
AT1G53285	105	11	0	0.905	226	278	0	0.552	MEG_CxL	NA
AT1G53290	59	10	0.0017	0.855	81	51	0	0.386	ColDom	6
AT1G53300	66	25	0.2863	0.725	23	49	0.844	0.681	Bial	0
AT1G53320	22	8	0.4947	0.733	17	15	0.0296	0.469	Bial	NA
AT1G53340	110	1	0	0.991	4	50	0.0001	0.926	MEG	NA
AT1G53345	84	27	0.0623	0.757	46	15	0	0.246	PEG_LxC	10
AT1G53350	67	21	0.082	0.761	36	48	0.0951	0.571	Bial	4
AT1G53360	22	24	0.0111	0.478	15	17	0.1468	0.531	Bial	0
AT1G53370	17	80	0	0.175	0	36	0.0001	1	LerDom	2
AT1G53380	155	59	0.0998	0.724	97	125	0.0023	0.563	Bial	4
AT1G53390	27	17	0.512	0.614	24	10	0	0.294	PEG_LxC	0
AT1G53420	42	44	0.0009	0.488	52	97	0.7433	0.651	PEG_CxL	4
AT1G53460	40	12	0.1516	0.769	42	32	0.0001	0.432	PEG_LxC	0
AT1G53480	989	374	0	0.726	545	138	0	0.202	PEG_LxC	6
AT1G53490	1138	511	0.0614	0.69	598	530	0	0.47	PEG_LxC	7
AT1G53510	314	89	0	0.779	133	174	0.0005	0.567	Bial	3
AT1G53520	688	283	0.0094	0.709	256	545	0.4831	0.68	Bial	5
AT1G53530	40	14	0.2999	0.741	37	41	0.0149	0.526	Bial	3
AT1G53560	48	24	1	0.667	1	359	0	0.997	MEG_LxC	4
AT1G53580	113	42	0.1313	0.729	19	125	0	0.868	MEG_LxC	3
AT1G53590	317	149	0.5865	0.68	189	480	0.01	0.717	Bial	4
AT1G53640	51	0	0	1	2	75	0	0.974	MEG	NA
AT1G53645	68	16	0.0091	0.81	19	44	0.6592	0.698	Bial	0
AT1G53650	207	119	0.2742	0.635	50	144	0.0414	0.742	Bial	1
AT1G53670	148	46	0.0076	0.763	66	119	0.5714	0.643	Bial	4
AT1G53680	214	45	0	0.826	89	78	0	0.467	PEG_LxC	4
AT1G53690	44	91	0	0.326	50	28	0	0.359	PEG	10
AT1G53710	42	26	0.4479	0.618	8	25	0.3359	0.758	Bial	4
AT1G53720	2307	1117	0.4346	0.674	2206	5543	0	0.715	Bial	1
AT1G53730	28	22	0.1433	0.56	13	38	0.2993	0.745	Bial	1
AT1G53750	755	230	0	0.766	392	650	0.0065	0.624	Bial	4
AT1G53760	75	12	0.0002	0.862	35	52	0.2287	0.598	MEG_CxL	1
AT1G53770	295	69	0	0.81	39	137	0.0034	0.778	Bial	0
AT1G53780	1167	336	0	0.776	491	687	0	0.583	Bial	4
AT1G53785	100	24	0.0018	0.806	47	13	0	0.217	PEG_LxC	1
AT1G53790	216	130	0.1251	0.624	77	146	0.7605	0.655	Bial	5
AT1G53800	350	329	0	0.515	288	439	0.0008	0.604	Bial	3
AT1G53801	86	119	0	0.42	92	135	0.0354	0.595	PEG_CxL	NA
AT1G53840	96	8	0	0.923	6	104	0	0.945	MEG	4
AT1G53910	26	8	0.2748	0.765	3	19	0.0761	0.864	Bial	0
AT1G54010	50	14	0.0723	0.781	2	23	0.0132	0.92	Bial	NA
AT1G54020	24	2	0.0093	0.923	3	33	0.0031	0.917	MEG	NA
AT1G54040	20	46	0	0.303	0	785	0	1	LerDom	NA
AT1G54050	203	37	0	0.846	24	60	0.4265	0.714	Bial	4
AT1G54060	137	45	0.0214	0.753	57	143	0.1989	0.715	Bial	3
AT1G54070	156	22	0	0.876	33	4	0	0.108	ColDom	NA
AT1G54150	170	14	0	0.924	99	114	0.0001	0.535	MEG_CxL	NA
AT1G54320	337	151	0.3155	0.691	176	367	0.711	0.676	Bial	0
AT1G54520	325	166	0.8506	0.662	172	326	0.6366	0.655	Bial	1
AT1G54570	40	60	0	0.4	13	98	0	0.883	LerDom	1
AT1G54580	325	98	0	0.768	89	243	0.0204	0.732	Bial	0
AT1G54630	33	7	0.0487	0.825	13	45	0.113	0.776	Bial	2
AT1G54650	217	56	0	0.795	49	170	0.0013	0.776	Bial	0
AT1G54680	138	41	0.0054	0.771	56	60	0.0014	0.517	Bial	NA
AT1G54690	679	236	0	0.742	249	483	0.7524	0.66	Bial	NA
AT1G54710	152	22	0	0.874	4	56	0	0.933	MEG	8
AT1G54920	315	84	0	0.789	120	259	0.5625	0.683	Bial	3
AT1G55040	94	124	0	0.431	53	116	0.6539	0.686	PEG_CxL	4
AT1G55140	185	18	0	0.911	23	119	0	0.838	poMEG	NA
AT1G55190	23	14	0.6133	0.622	17	13	0.0123	0.433	Bial	NA
AT1G55265	18	21	0.0108	0.462	9	19	0.9182	0.679	Bial	NA
AT1G55325	96	40	0.3877	0.706	73	138	0.7542	0.654	Bial	4
AT1G55350	69	9	0.0001	0.885	21	69	0.0681	0.767	MEG_CxL	2
AT1G55440	67	6	0	0.918	3	33	0.0031	0.917	MEG	NA
AT1G55450	153	0	0	1	2	31	0.0019	0.939	MEG	NA
AT1G55460	3896	1660	0	0.701	4761	11265	0	0.703	Bial	1
AT1G55470	17	4	0.2071	0.81	2	18	0.0433	0.9	Bial	NA
AT1G55475	39	15	0.4429	0.722	8	24	0.3882	0.75	Bial	4
AT1G55480	43	39	0.0104	0.524	33	31	0.004	0.484	PEG_LxC	3
AT1G55490	376	164	0.1835	0.696	188	483	0.0068	0.72	Bial	4
AT1G55500	209	109	0.7615	0.657	36	83	0.5488	0.697	Bial	4
AT1G55510	124	24	0	0.838	14	37	0.4451	0.725	Bial	5
AT1G55520	575	238	0.0219	0.707	185	297	0.0313	0.616	Bial	4
AT1G55530	181	63	0.02	0.742	159	335	0.6558	0.678	Bial	4
AT1G55535	280	116	0.1175	0.707	94	337	0	0.782	Bial	3
AT1G55540	124	57	0.649	0.685	40	147	0.0012	0.786	Bial	4
AT1G55550	349	111	0.0001	0.759	145	286	0.9173	0.664	Bial	3
AT1G55560	602	179	0	0.771	395	22	0	0.053	PEG_LxC	4
AT1G55570	87	21	0.0039	0.806	123	11	0	0.082	PEG_LxC	NA
AT1G55600	152	73	0.8111	0.676	172	106	0	0.381	PEG_LxC	NA
AT1G55610	57	29	0.9504	0.663	8	57	0.0008	0.877	MEG_LxC	NA
AT1G55620	38	10	0.0903	0.792	9	60	0.0008	0.87	MEG_LxC	1
AT1G55650	105	2	0	0.981	4	70	0	0.946	MEG	3
AT1G55670	261	48	0	0.845	103	220	0.649	0.681	Bial	0
AT1G55675	316	54	0	0.854	80	242	0.0026	0.752	poMEG	3
AT1G55690	280	142	0.9106	0.664	62	342	0	0.847	Bial	0
AT1G55730	35	12	0.3089	0.745	8	62	0.0003	0.886	MEG_LxC	4
AT1G55740	140	4	0	0.972	11	12	0.1908	0.522	MEG_CxL	4
AT1G55750	314	112	0.0037	0.737	193	239	0	0.553	Bial	3
AT1G55760	44	23	0.886	0.657	12	22	0.8494	0.647	Bial	3
AT1G55770	52	8	0.0019	0.867	37	6	0	0.14	ColDom	NA
AT1G55790	20	13	0.5166	0.606	20	1	0	0.048	PEG_LxC	NA
AT1G55810	5539	1411	0	0.797	1763	1818	0	0.508	Bial	NA
AT1G55820	104	35	0.0589	0.748	30	88	0.1006	0.746	Bial	1
AT1G55840	104	28	0.0055	0.788	34	133	0.0009	0.796	Bial	0
AT1G55860	159	30	0	0.841	25	93	0.0097	0.788	Bial	2
AT1G55880	63	30	0.8529	0.677	53	112	0.7925	0.679	Bial	4
AT1G55890	248	19	0	0.929	80	78	0	0.494	ColDom	1
AT1G55900	96	35	0.1417	0.733	66	105	0.1955	0.614	Bial	1
AT1G55910	179	22	0	0.891	65	68	0.0004	0.511	MEG_CxL	4
AT1G55915	46	16	0.2563	0.742	34	33	0.005	0.493	PEG_LxC	4
AT1G55920	68	22	0.0998	0.756	29	102	0.0121	0.779	Bial	3
AT1G55930	1293	323	0	0.8	774	1058	0	0.578	Bial	4
AT1G55960	688	346	0.9431	0.665	133	672	0	0.835	Bial	4
AT1G55970	166	34	0	0.83	92	101	0.0001	0.523	Bial	4
AT1G56000	47	49	0.0005	0.49	14	76	0.0008	0.844	PEG_CxL	1
AT1G56020	56	11	0.0057	0.836	12	15	0.2834	0.556	Bial	3
AT1G56045	597	137	0	0.813	275	529	0.6663	0.658	Bial	5
AT1G56070	6931	2379	0	0.744	3065	5703	0.0027	0.65	Bial	3
AT1G56110	2811	963	0	0.745	2552	4337	0	0.63	Bial	3
AT1G56120	136	50	0.0852	0.731	60	82	0.0394	0.577	Bial	3
AT1G56130	24	31	0.0006	0.436	7	46	0.0039	0.868	LerDom	3
AT1G56170	5860	2109	0	0.735	2782	4481	0	0.617	Bial	3
AT1G56220	1909	395	0	0.829	237	1125	0	0.826	Bial	NA
AT1G56260	82	56	0.0964	0.594	75	68	0	0.476	PEG_LxC	3
AT1G56290	1829	1491	0	0.551	1545	4820	0	0.757	Bial	5
AT1G56300	134	14	0	0.905	39	125	0.0169	0.762	MEG_CxL	1
AT1G56340	24	7	0.2516	0.774	2	19	0.0341	0.905	Bial	NA
AT1G56345	227	42	0	0.844	58	185	0.0036	0.761	Bial	3
AT1G56400	314	218	0.0004	0.59	302	83	0	0.216	PEG_LxC	12
AT1G56418	78	70	0.0006	0.527	23	124	0	0.844	Bial	NA
AT1G56420	132	43	0.0217	0.754	85	203	0.2248	0.705	Bial	3
AT1G56450	237	35	0	0.871	10	68	0.0003	0.872	MEG	1
AT1G56460	72	16	0.0045	0.818	123	105	0	0.461	PEG_LxC	4
AT1G56470	42	7	0.0079	0.857	17	61	0.049	0.782	MEG_CxL	NA
AT1G56480	44	30	0.2343	0.595	45	175	0.0001	0.795	Bial	NA
AT1G56500	359	71	0	0.835	178	88	0	0.331	PEG_LxC	4
AT1G56510	107	6	0	0.947	9	26	0.4111	0.743	MEG_CxL	2
AT1G56560	66	14	0.0047	0.825	20	87	0.0028	0.813	Bial	4
AT1G56580	31	1	0.0006	0.969	10	29	0.3787	0.744	MEG_CxL	3
AT1G56590	195	84	0.3051	0.699	74	194	0.0719	0.724	Bial	0
AT1G56610	960	354	0	0.731	364	1080	0	0.748	Bial	6
AT1G56612	1091	457	0.0027	0.705	481	1183	0.0003	0.711	Bial	NA
AT1G57540	106	66	0.2028	0.616	23	162	0	0.876	MEG_LxC	4
AT1G57565	69	38	0.6808	0.645	121	258	0.6298	0.681	Bial	7
AT1G57580	51	16	0.1327	0.761	42	23	0	0.354	PEG_LxC	1
AT1G57600	258	100	0.0441	0.721	73	240	0.0004	0.767	Bial	4
AT1G57610	133	11	0	0.924	31	80	0.2905	0.721	MEG_CxL	7
AT1G57680	376	82	0	0.821	134	375	0.0018	0.737	Bial	1
AT1G57700	372	195	0.6433	0.656	120	265	0.4395	0.688	Bial	5
AT1G57720	830	440	0.377	0.654	312	894	0	0.741	Bial	4
AT1G57765	72	20	0.0279	0.783	27	59	0.7587	0.686	Bial	4
AT1G57770	622	314	0.9099	0.665	196	591	0	0.751	Bial	4
AT1G57780	827	763	0	0.52	497	1614	0	0.765	Bial	7
AT1G57790	80	54	0.1164	0.597	46	45	0.0011	0.495	PEG_LxC	3
AT1G57800	163	1331	0	0.109	975	110	0	0.101	PEG	12
AT1G57820	40	453	0	0.081	461	89	0	0.162	PEG	12
AT1G57835	10	11	0.0878	0.476	15	22	0.4249	0.595	Bial	NA
AT1G57860	39	2	0.0002	0.951	16	11	0.0082	0.407	ColDom	NA
AT1G57870	131	61	0.6932	0.682	54	59	0.0024	0.522	Bial	3
AT1G57980	24	0	0.001	1	0	28	0.0005	1	MEG	5
AT1G58025	294	34	0	0.896	58	83	0.0754	0.589	MEG_CxL	4
AT1G58030	1410	326	0	0.812	572	852	0	0.598	Bial	4
AT1G58055	1128	74	0	0.938	320	114	0	0.263	ColDom	4
AT1G58060	204	104	0.894	0.662	96	316	0	0.767	Bial	4
AT1G58070	57	16	0.0553	0.781	35	102	0.0804	0.745	Bial	4
AT1G58080	347	110	0.0001	0.759	76	330	0	0.813	Bial	5
AT1G58100	480	128	0	0.789	173	420	0.0504	0.708	Bial	0
AT1G58110	85	0	0	1	23	13	0.0003	0.361	ColDom	3
AT1G58120	421	188	0.2439	0.691	585	17	0	0.028	PEG_LxC	NA
AT1G58122	421	188	0.2439	0.691	585	17	0	0.028	PEG_LxC	NA
AT1G58160	65	38	0.4998	0.631	74	113	0.1033	0.604	Bial	4
AT1G58180	691	34	0	0.953	29	486	0	0.944	MEG	0
AT1G58220	105	56	0.74	0.652	38	80	0.8375	0.678	Bial	NA
AT1G58230	220	128	0.2159	0.632	60	250	0	0.806	Bial	4
AT1G58235	46	3	0.0001	0.939	23	3	0	0.115	ColDom	7
AT1G58250	223	119	0.6184	0.652	131	279	0.6221	0.68	Bial	4
AT1G58280	45	12	0.069	0.789	5	26	0.0653	0.839	Bial	1
AT1G58290	1186	247	0	0.828	445	588	0	0.569	Bial	4
AT1G58350	73	14	0.0013	0.839	10	83	0	0.892	poMEG	2
AT1G58380	482	146	0	0.768	321	433	0	0.574	Bial	2
AT1G58390	23	7	0.2967	0.767	14	6	0.0012	0.3	PEG_LxC	NA
AT1G58440	78	17	0.0026	0.821	54	57	0.0014	0.514	Bial	1
AT1G58470	88	56	0.1986	0.611	57	303	0	0.842	Bial	7
AT1G58520	54	53	0.0008	0.505	21	242	0	0.92	MEG_LxC	4
AT1G58602	259	14	0	0.949	0	44	0	1	MEG	11
AT1G59500	141	45	0.0133	0.758	25	134	0	0.843	Bial	4
AT1G59510	11	12	0.0766	0.478	14	63	0.0091	0.818	Bial	5
AT1G59520	1040	144	0	0.878	553	320	0	0.367	ColDom	4
AT1G59540	176	35	0	0.834	31	159	0	0.837	Bial	4
AT1G59560	29	12	0.6319	0.707	40	17	0	0.298	PEG_LxC	1
AT1G59600	585	361	0.003	0.618	396	1306	0	0.767	Bial	4
AT1G59610	325	124	0.0162	0.724	195	261	0.0001	0.572	Bial	4
AT1G59620	41	22	0.8213	0.651	13	31	0.6601	0.705	Bial	4
AT1G59640	38	2	0.0003	0.95	25	30	0.085	0.545	MEG_CxL	0
AT1G59660	311	72	0	0.812	149	255	0.1787	0.631	Bial	4
AT1G59670	445	112	0	0.799	461	675	0	0.594	Bial	5
AT1G59700	80	11	0	0.879	45	47	0.0032	0.511	MEG_CxL	0
AT1G59750	322	102	0.0001	0.759	65	233	0.0001	0.782	Bial	3
AT1G59760	111	77	0.0393	0.59	78	173	0.5214	0.689	Bial	4
AT1G59790	95	67	0.0442	0.586	123	130	0	0.514	Bial	NA
AT1G59800	245	92	0.0285	0.727	143	303	0.6374	0.679	Bial	4
AT1G59820	301	103	0.0016	0.745	126	373	0.0003	0.747	Bial	3
AT1G59830	509	156	0	0.765	252	396	0.0054	0.611	Bial	3
AT1G59840	257	17	0	0.938	81	51	0	0.386	ColDom	6
AT1G59850	118	2	0	0.983	60	32	0	0.348	ColDom	0
AT1G59865	182	4	0	0.978	232	116	0	0.333	ColDom	0
AT1G59900	61	45	0.0654	0.575	16	125	0	0.887	MEG_LxC	0
AT1G59960	39	100	0	0.281	4	231	0	0.983	LerDom	2
AT1G59970	31	38	0.0003	0.449	8	120	0	0.938	LerDom	5
AT1G59990	65	26	0.3912	0.714	12	108	0	0.9	MEG_LxC	0
AT1G60000	34	6	0.0216	0.85	25	14	0.0001	0.359	PEG_LxC	1
AT1G60010	174	104	0.1894	0.626	135	307	0.2757	0.695	Bial	4
AT1G60030	36	4	0.0032	0.9	6	55	0.0003	0.902	MEG	4
AT1G60070	25	11	0.7633	0.694	14	55	0.0355	0.797	Bial	4
AT1G60080	45	37	0.0352	0.549	31	101	0.0278	0.765	Bial	0
AT1G60140	88	23	0.0081	0.793	20	144	0	0.878	poMEG	4
AT1G60200	6629	3228	0.2669	0.673	3714	8355	0	0.692	Bial	NA
AT1G60220	8	13	0.0091	0.381	5	31	0.023	0.861	PEG_CxL	12
AT1G60240	23	12	0.9224	0.657	17	3	0	0.15	PEG_LxC	NA
AT1G60260	108	0	0	1	10	123	0	0.925	MEG	NA
AT1G60270	18	11	0.649	0.621	0	26	0.0007	1	MEG_LxC	4
AT1G60400	36	229	0	0.136	208	4	0	0.019	PEG	12
AT1G60410	9	43	0	0.173	88	10	0	0.102	PEG	12
AT1G60420	220	183	0	0.546	212	488	0.1253	0.697	Bial	4
AT1G60430	206	19	0	0.916	97	33	0	0.254	ColDom	4
AT1G60440	222	57	0	0.796	91	308	0	0.772	Bial	4
AT1G60460	82	15	0.0004	0.845	33	56	0.5264	0.629	Bial	3
AT1G60490	812	224	0	0.784	290	626	0.3516	0.683	Bial	1
AT1G60505	263	128	0.8329	0.673	141	286	0.9168	0.67	Bial	NA
AT1G60510	257	128	0.9777	0.668	141	286	0.9168	0.67	Bial	NA
AT1G60540	283	135	0.6998	0.677	112	308	0.0073	0.733	Bial	NA
AT1G60545	429	225	0.6137	0.656	173	524	0	0.752	Bial	NA
AT1G60550	750	594	0	0.558	217	973	0	0.818	Bial	4
AT1G60560	137	60	0.4484	0.695	149	238	0.0495	0.615	Bial	4
AT1G60590	70	6	0	0.921	7	18	0.6395	0.72	MEG_CxL	NA
AT1G60600	166	61	0.0558	0.731	150	163	0	0.521	Bial	4
AT1G60610	220	55	0	0.8	71	51	0	0.418	PEG_LxC	5
AT1G60620	506	266	0.5626	0.655	224	653	0	0.745	Bial	4
AT1G60640	578	203	0	0.74	404	713	0.0685	0.638	Bial	3
AT1G60650	753	417	0.1248	0.644	271	606	0.174	0.691	Bial	4
AT1G60660	93	45	0.8805	0.674	14	161	0	0.92	MEG_LxC	5
AT1G60670	532	161	0	0.768	213	336	0.0122	0.612	Bial	4
AT1G60680	62	4	0	0.939	11	17	0.5766	0.607	MEG_CxL	NA
AT1G60690	96	41	0.4539	0.701	59	92	0.1839	0.609	Bial	3
AT1G60700	112	365	0	0.235	54	591	0	0.916	LerDom	4
AT1G60710	23	17	0.2678	0.575	10	24	0.6918	0.706	Bial	NA
AT1G60730	110	22	0.0001	0.833	64	34	0	0.347	PEG_LxC	4
AT1G60740	255	15	0	0.944	44	0	0	0	ColDom	NA
AT1G60770	122	49	0.2405	0.713	71	235	0.0004	0.768	Bial	4
AT1G60780	701	171	0	0.804	335	571	0.0333	0.63	Bial	4
AT1G60800	739	91	0	0.89	181	375	0.7539	0.674	MEG_CxL	1
AT1G60810	272	197	0.0002	0.58	92	320	0	0.777	Bial	5
AT1G60860	75	34	0.6835	0.688	47	61	0.0403	0.565	Bial	0
AT1G60870	123	2	0	0.984	5	30	0.0285	0.857	MEG_CxL	4
AT1G60890	420	184	0.1725	0.695	178	362	0.8876	0.67	Bial	4
AT1G60900	2413	776	0	0.757	1026	1744	0.0001	0.63	Bial	4
AT1G60920	31	26	0.069	0.544	0	25	0.0009	1	MEG_LxC	NA
AT1G60930	146	8	0	0.948	30	15	0	0.333	ColDom	4
AT1G60940	3666	1202	0	0.753	1070	2248	0.2435	0.678	Bial	4
AT1G60970	179	53	0.0014	0.772	74	129	0.4181	0.635	Bial	0
AT1G60983	65	4	0	0.942	8	13	0.7057	0.619	MEG_CxL	NA
AT1G60985	30	9	0.2179	0.769	8	15	0.9106	0.652	Bial	NA
AT1G60986	36	3	0.0013	0.923	54	30	0	0.357	ColDom	0
AT1G60989	392	213	0.384	0.648	251	500	0.9679	0.666	Bial	NA
AT1G60990	841	329	0.0003	0.719	447	893	0.9909	0.666	Bial	4
AT1G61030	73	5	0	0.936	45	151	0.0042	0.77	poMEG	7
AT1G61040	23	54	0	0.299	18	70	0.0184	0.795	PEG_CxL	4
AT1G61065	89	59	0.1221	0.601	53	107	0.9651	0.669	Bial	1
AT1G61080	4	20	0	0.167	18	8	0.0003	0.308	PEG	NA
AT1G61097	25	2	0.0072	0.926	0	51	0	1	MEG	NA
AT1G61100	23	10	0.7535	0.697	7	19	0.5603	0.731	Bial	4
AT1G61140	1336	514	0	0.722	715	1521	0.2301	0.68	Bial	0
AT1G61150	287	114	0.0535	0.716	102	365	0	0.782	Bial	3
AT1G61190	186	0	0	1	67	0	0	0	ColDom	4
AT1G61210	163	108	0.0341	0.601	84	202	0.2087	0.706	Bial	NA
AT1G61215	252	34	0	0.881	73	54	0	0.425	ColDom	5
AT1G61224	54	157	0	0.256	19	51	0.3399	0.729	PEG_CxL	NA
AT1G61230	96	16	0	0.857	66	16	0	0.195	ColDom	4
AT1G61240	226	266	0	0.459	48	595	0	0.925	LerDom	3
AT1G61250	487	179	0.0008	0.731	272	547	0.9531	0.668	Bial	3
AT1G61255	376	4	0	0.989	3	262	0	0.989	MEG	NA
AT1G61260	493	65	0	0.884	77	54	0	0.412	ColDom	0
AT1G61290	61	11	0.0021	0.847	70	10	0	0.125	PEG_LxC	4
AT1G61330	126	49	0.1723	0.72	59	54	0.0001	0.478	PEG_LxC	12
AT1G61340	686	152	0	0.819	462	467	0	0.503	Bial	4
AT1G61350	55	8	0.001	0.873	20	25	0.1585	0.556	MEG_CxL	5
AT1G61450	536	376	0	0.588	311	738	0.0199	0.704	Bial	4
AT1G61520	1554	394	0	0.798	308	1005	0	0.765	Bial	0
AT1G61550	48	16	0.1986	0.75	8	12	0.5984	0.6	Bial	3
AT1G61560	81	119	0	0.405	62	269	0	0.813	PEG_CxL	4
AT1G61563	439	13	0	0.971	206	0	0	0	ColDom	NA
AT1G61566	859	189	0	0.82	304	0	0	0	PEG_LxC	NA
AT1G61570	173	57	0.0099	0.752	76	109	0.0412	0.589	Bial	3
AT1G61580	1345	638	0.3264	0.678	762	1202	0	0.612	Bial	3
AT1G61630	92	112	0	0.451	66	101	0.1287	0.605	PEG_CxL	3
AT1G61640	143	45	0.0104	0.761	60	135	0.521	0.692	Bial	4
AT1G61690	27	3	0.011	0.9	19	34	0.7548	0.642	Bial	6
AT1G61720	817	0	0	1	11	1066	0	0.99	MEG	3
AT1G61730	970	387	0.0004	0.715	454	814	0.0923	0.642	Bial	4
AT1G61740	64	0	0	1	6	20	0.3357	0.769	MEG_CxL	5
AT1G61770	43	20	0.8213	0.683	15	105	0	0.875	MEG_LxC	4
[truncated: 9,058 more rows]
